# Supplementary material for: Eya2 promotes cell cycle progression by regulating DNA damage response during vertebrate limb regeneration
Source: eLife. 2020 Mar 6;9:e51217. doi: 10.7554/eLife.51217 (PMC7093111; doi:10.7554/eLife.51217)
Supplement: Supplementary file 1. — This file contains gene expression data related to DDR from high-throughput studies. DDR Genes: Data related to Figure 1a and Figure 1—figure supplement 1a. DDR Analysis – Figure 1b: Data related to Figure 1b. DDR Analysis Eya2- RNAseq: Data related to Figure 5b. [file elife-51217-supp1.xlsx]

## Sheet: DDR Genes
Annotation			Microarray Dataset (Voss et al., 2015)			RNAseq Dataset (Stewart et al., 2013)
Gene Name	Category (related to Figure 1a)	Uniprot ID	Probe ID (Up, Down, Plateau, Mixed)			geneid	symbol	num_refs	total_ref_length	e_value_min	e_value_median	e_value_max	0hr	3hr	6hr	12hr	1d	3d	5d	7d	10d	14d	21d	28d
UNG	Base Excision Repair	UNG_HUMAN	axo00441-f			7374	UNG	3	1802	2e-79	2e-50	2e-19	2.01314	1.36569	4.24079	2.37195	5.60194	9.1676	14.7084	11.2357	13.7332	8.02813	8.77371	7.65708
SMUG1	Base Excision Repair	SMUG1_HUMAN
MBD4	Base Excision Repair	MBD4_HUMAN
TDG	Base Excision Repair	TDG_HUMAN				6996	TDG	2	4163	3e-122	5e-08	1e-07	41.9071	25.4533	50.8012	50.9635	73.3391	152.387	178.973	207.318	268.673	197.841	100.625	83.061
OGG1	Base Excision Repair	OGG1_HUMAN	axo08314	axo15926		4968	OGG1	3	1369	8e-18	2e-17	1e-09	14.8249	11.0654	13.0329	11.0717	16.4156	17.1892	12.0834	9.08804	15.4602	8.53672	10.3074	12.1256
MUTYH (MYH)	Base Excision Repair	MUTYH_HUMAN
NTHL1 (NTH1)	Base Excision Repair	NTH_HUMAN	axo08298
MPG	Base Excision Repair	3MG_HUMAN				4350	MPG	2	1352	2e-51	1e-30	2e-30	1.11969	0.894147	2.62562	1.23007	2.66214	3.41214	3.92622	2.0434	1.12393	3.90553	2.78109	1.25764
NEIL1	Base Excision Repair	NEIL1_HUMAN	axo18878			79661	NEIL1	1	764	5e-11	5e-11	5e-11	2.84107	1.55721	2.96509	3.74892	4.55529	1.57904	7.00556	0	0	3.40085	1.45303	2.01503
NEIL2	Base Excision Repair	NEIL2_HUMAN
NEIL3	Base Excision Repair	NEIL3_HUMAN	axo16742			55247	NEIL3	2	1900	1e-92	1e-50	2e-50	9.06321	4.68869	7.53612	4.21716	1.59024	11.9894	10.4975	9.22431	12.2997	11.8381	9.51088	8.98462
APEX1 (APE1)	Base Excision Repair	APEX1_HUMAN	axo00384			328	APEX1	4	5928	9e-115	2e-96	7e-19	29.4635	12.1914	22.8586	29.35	24.0022	56.9419	77.524	109.627	133.148	134.951	65.9368	47.7707
APEX2	Base Excision Repair	APEX2_HUMAN	axo13811			27301	APEX2	2	1535	1e-23	1.55e-22	3e-22	0.321198	3.29473	5.2855	1.59047	1.51067	1.66522	3.83119	3.61486	2.92106	9.41448	4.21151	1.65063
LIG3	Base Excision Repair	DNLI3_HUMAN	axo08093	axo13424		3980	LIG3	2	1579	2e-144	5e-11	1e-10	4.04555	3.00201	3.68696	8.83269	5.8545	6.85427	18.2689	13.6696	18.8673	18.0186	14.9302	8.70868
XRCC1	Base Excision Repair	XRCC1_HUMAN	axo11936			7515	XRCC1	6	3722	1e-62	1.5e-31	8e-08	0.681948	0.548211	1.40138	0.791877	1.92441	2.00122	2.13234	2.85646	3.30764	3.59178	3.27382	2.19755
PNKP	Base Excision Repair	PNKP_HUMAN	axo12819			11284	PNKP	2	1228	1e-85	5e-19	1e-18	6.21074	2.68277	5.56331	3.77766	6.49122	11.4755	10.3637	11.7842	10.0413	12.3577	10.2523	12.6403
APLF (C2ORF13)	Base Excision Repair	APLF_HUMAN	axo02121			200558	APLF	2	784	2e-23	3.5e-11	7e-11	1.42304	2.28794	1.12474	1.18031	1.67322	0.580002	6.16482	3.13719	6.68646	2.49836	5.33717	5.43043
PARP1 (ADPRT)	Base Excision Repair	PARP1_HUMAN	axo07415	axo07417		142	PARP1	6	4268	5e-175	1.01e-58	1e-25	17.029	18.4788	24.2294	20.101	19.4797	34.0881	43.5512	49.5637	63.3217	74.869	28.618	20.3705
PARP2 (ADPRTL2)	Base Excision Repair	PARP2_HUMAN	axo04366			10038	PARP2	3	3165	1e-66	1e-29	1e-13	21.2607	16.0014	23.0027	20.1895	24.8288	24.2157	42.8181	32.4128	33.8273	36.6538	24.8758	24.555
PARP3 (ADPRTL3)	Base Excision Repair	PARP3_HUMAN	axo11114			10039	PARP3	2	2266	5e-62	3.5e-38	7e-38	3.72925	4.3765	5.79239	6.26096	13.3655	12.0863	17.9406	12.6944	21.2705	19.105	19.762	23.4157
MGMT	Direct reversal of damage	MGMT_HUMAN	axo08171			4255	MGMT	1	698	2e-15	2e-15	2e-15	2.48817	1.14955	0.565111	1.18607	0.560461	0	2.76017	1.57625	0	1.88291	0	1.81897
ALKBH2 (ABH2)	Direct reversal of damage	ALKB2_HUMAN	axo06774			121642	ALKBH2	1	955	2e-75	2e-75	2e-75	20.569	17.0257	24.7146	19.0138	13.8348	17.2438	14.5297	15.5636	10.7311	12.3944	18.1562	17.4984
ALKBH3 (DEPC1)	Direct reversal of damage	ALKB3_HUMAN	axo00934			221120	ALKBH3	2	945	8e-67	4e-33	8e-33	4.51574	4.996	9.36003	10.3001	11.0617	5.98169	8.69458	10.5774	11.978	13.884	14.8194	10.5309
MSH2	Mismatch Excision Repair	MSH2_HUMAN	axo04293	axo04294		4436	MSH2	3	2493	6e-129	5e-127	5e-50	18.4197	17.4648	20.0891	19.9489	17.5091	26.8559	36.2951	29.8269	31.483	36.1657	32.043	31.7854
MSH3	Mismatch Excision Repair	MSH3_HUMAN	axo08201
MSH6	Mismatch Excision Repair	MSH6_HUMAN	axo19509			2956	MSH6	4	3089	3e-72	1e-28	1e-27	3.35253	4.23106	6.68615	4.63006	4.24822	9.74825	15.3543	9.49349	17.6183	18.9428	9.09834	8.24902
MLH1	Mismatch Excision Repair	MLH1_HUMAN	axo04255			4292	MLH1	2	1098	6e-78	1.5e-46	3e-46	1.88721	1.13783	1.8645	3.91326	1.1095	3.46134	4.99624	2.6003	4.2907	8.30389	6.01634	4.00096
PMS2	Mismatch Excision Repair	PMS2_HUMAN	axo06920			5395	PMS2	2	1347	3e-42	1.02e-40	2e-40	1.11699	0.299311	0.882837	0.30882	1.16743	1.51753	2.15064	1.54725	2.25737	1.63419	1.955	0.631481
MSH4	Mismatch Excision Repair	MSH4_HUMAN
MSH5	Mismatch Excision Repair	MSH5_HUMAN
MLH3	Mismatch Excision Repair	MLH3_HUMAN				27030	MLH3	2	1280	6e-35	4e-06	8e-06	2.92489	4.75969	4.36769	5.53622	4.02234	6.70871	2.65998	3.48076	1.19657	4.15795	3.78691	3.3473
PMS1	Mismatch Excision Repair	PMS1_HUMAN	axo05662	axo06900		5378	PMS1	3	2162	3e-60	2e-59	1e-36	2.117	2.40215	7.54313	3.43554	3.78197	2.06108	4.11368	3.54717	5.60924	4.03753	4.68462	3.50863
PMS2L3	Mismatch Excision Repair	PM2P3_HUMAN				5387	PMS2L3	1	382	2e-06	2e-06	2e-06	0	0	2.32471	0	1.15279	0	4.81364	3.24211	0	10.3277	4.41254	4.97602
XPC	Nucleotide Excision Repair	XPC_HUMAN				7508	XPC	1	1043	6e-48	6e-48	6e-48	0	2.20929	2.8962	0.759825	3.59046	1.12013	1.76382	3.02935	1.38852	3.61872	1.7179	0.776854
RAD23B	Nucleotide Excision Repair	RD23B_HUMAN	axo08631			5887	RAD23B	10	8645	7e-69	1e-12	8e-06	65.5496	60.8037	71.1359	67.6216	57.3803	77.6903	87.5019	105.197	110.232	86.4973	71.802	83.3655
CETN2	Nucleotide Excision Repair	CETN2_HUMAN	axo09976	axo09977		1069	CETN2	2	2234	1e-75	2e-75	3e-75	40.6954	26.3491	50.4123	42.6707	29.1998	39.8723	45.9836	56.0119	52.855	58.1085	46.9683	49.0418
RAD23A	Nucleotide Excision Repair	RD23A_HUMAN	axo10723			5886	RAD23A	3	3337	1e-125	6e-49	9e-38	109.306	101.606	108.708	108.196	137.526	177.844	213.208	180.689	223.079	172.7	129.453	133.693
XPA	Nucleotide Excision Repair	XPA_HUMAN				7507	XPA	1	1034	1e-73	1e-73	1e-73	13.5523	15.2434	13.1708	18.3815	13.7729	22.2452	20.832	34.418	30.8365	22.2425	24.0459	22.3342
DDB1	Nucleotide Excision Repair	DDB1_HUMAN	axo07717			1642	DDB1	4	3578	0	2e-29	6e-18	15.0285	14.0262	17.3975	14.683	18.8557	16.8918	27.3305	27.487	38.1701	39.256	32.2602	27.9472
DDB2 (XPE)	Nucleotide Excision Repair	DDB2_HUMAN	axo23769
RPA1	Nucleotide Excision Repair	RFA1_HUMAN	axo08701	axo08702		6117	RPA1	3	2452	4e-49	3e-47	1e-37	18.3633	20.0266	24.2933	15.9048	29.4366	47.9218	66.6778	46.144	64.3677	52.9829	33.4029	29.9598
RPA2	Nucleotide Excision Repair	RFA2_HUMAN	axo08703			6118	RPA2	2	1342	9e-62	4.5e-18	9e-18	54.0527	33.0221	63.8168	51.8821	41.5936	80.1525	102.439	100.422	117.168	169.307	120.907	100.813
RPA3	Nucleotide Excision Repair	RFA3_HUMAN	axo08704			6119	RPA3	1	1149	3e-38	3e-38	3e-38	50.1306	37.9384	55.7341	72.0845	47.4053	79.7515	83.6429	64.6473	104.687	134.523	145.017	95.8215
ERCC3 (XPB)	Nucleotide Excision Repair	ERCC3_HUMAN	axo13175			2071	ERCC3	3	1461	3e-89	2e-72	9e-57	5.44208	4.66648	6.5953	8.72671	8.24454	8.88414	7.33471	6.39862	8.79853	11.7837	9.79715	6.76862
ERCC2 (XPD)	Nucleotide Excision Repair	ERCC2_HUMAN	axo05810			2068	ERCC2	4	2422	8e-134	1.5e-47	5e-40	7.15334	3.04776	4.49146	8.72352	5.11253	7.37463	7.49414	9.96293	10.2046	15.6744	12.2971	9.27585
GTF2H1	Nucleotide Excision Repair	TF2H1_HUMAN	axo06402			2965	GTF2H1	6	2560	3e-48	1e-19	3e-14	1.06625	0.685715	1.51692	1.23812	0.50148	1.56449	1.43706	2.35061	1.93935	2.99512	1.6028	1.93859
GTF2H2	Nucleotide Excision Repair	TF2H2_HUMAN	axo07338			2966	GTF2H2	1	773	3e-116	3e-116	3e-116	3.18638	1.0246	3.10271	2.1143	6.68387	1.03896	4.4479	2.10737	3.8637	2.2936	4.37871	2.85882
GTF2H3	Nucleotide Excision Repair	TF2H3_HUMAN	axo07339			2967	GTF2H3	2	1746	3e-109	5e-92	1e-91	3.33965	4.92196	7.03886	5.73158	4.34127	11.2523	9.66664	7.42075	5.06194	14.8218	13.3605	6.37217
GTF2H4	Nucleotide Excision Repair	TF2H4_HUMAN				2968	GTF2H4	1	1133	1e-43	1e-43	1e-43	2.09391	2.69323	4.30292	4.16818	12.1723	14.6859	12.889	6.00099	15.234	8.11328	4.0837	6.74398
GTF2H5 (TTDA)	Nucleotide Excision Repair	TF2H5_HUMAN	axo03513			404672	GTF2H5	1	670	3e-31	3e-31	3e-31	95.0755	91.7438	88.8219	88.1843	78.2262	138.4	121.976	165.102	129.437	161.849	140.835	105.006
CDK7	Nucleotide Excision Repair	CDK7_HUMAN	axo07603			1022	CDK7	2	1792	8e-140	4e-73	8e-73	9.45426	8.47845	9.19088	4.03745	15.6973	33.2892	27.5963	26.2409	33.8655	25.9966	17.851	13.7644
CCNH	Nucleotide Excision Repair	CCNH_HUMAN	axo07043			902	CCNH	2	1087	6e-87	5e-28	1e-27	48.1019	31.4722	50.5655	57.3329	39.4871	76.2301	73.5359	66.8364	75.2604	131.515	60.882	91.8135
MNAT1	Nucleotide Excision Repair	MAT1_HUMAN	axo08189			4331	MNAT1	2	1596	2e-143	1e-30	2e-30	14.1725	16.3147	18.2132	19.3835	13.2571	16.8016	20.7751	20.6724	30.4721	20.2446	16.8332	20.3394
ERCC5 (XPG)	Nucleotide Excision Repair	ERCC5_HUMAN	axo13356	axo13357		2073	ERCC5	2	1422	5e-70	5e-62	1e-61	0.350096	0.562876	0.83012	1.16152	4.36069	3.70998	3.72425	2.70133	2.12258	3.69094	3.8945	2.67198
ERCC1	Nucleotide Excision Repair	ERCC1_HUMAN	axo07777
ERCC4 (XPF)	Nucleotide Excision Repair	XPF_HUMAN	axo10904			2072	ERCC4	3	913	1e-51	5e-51	3e-15	0.662229	0	0.523409	1.09854	0.519102	0.539821	0	0.729963	0	1.16264	1.49023	0
LIG1	Nucleotide Excision Repair	DNLI1_HUMAN	axo04151	axo04152		3978	LIG1	4	3361	2e-59	1.5e-56	8e-07	53.0379	41.3774	43.4011	47.442	42.838	51.2835	78.7728	95.3197	115.118	114.732	80.6473	62.8287
ERCC8 (CSA)	Nucleotide Excision Repair	ERCC8_HUMAN	axo09652			1161	ERCC8	1	568	1e-82	1e-82	1e-82	2.71992	3.64419	5.01609	9.0239	9.22473	7.39054	6.98256	13.9912	8.24522	11.938	10.8812	9.99498
ERCC6 (CSB)	Nucleotide Excision Repair	ERCC6_HUMAN	axo13526			2074	ERCC6	3	1380	1e-34	1e-26	5e-22	0.777578	1.25017	0.921866	0.644945	1.5238	1.2677	1.12286	0.835682	2.35717	0.682575	1.45817	1.6485
UVSSA (KIAA1530)	Nucleotide Excision Repair	UVSSA_HUMAN	axo17854			57654	KIAA1530	3	2206	1e-86	8e-39	2e-35	9.63924	9.40884	12.7971	11.7745	13.3664	9.34475	10.3829	16.8417	15.0871	17.9507	12.012	16.0417
XAB2 (HCNP)	Nucleotide Excision Repair	SYF1_HUMAN	axo17410			56949	XAB2	2	1341	8e-68	2.5e-36	5e-36	1.12269	0.902518	0.591563	0.620793	1.76009	5.79607	7.92594	6.1876	6.80669	10.1837	5.05283	3.17353
MMS19	Nucleotide Excision Repair	MMS19_HUMAN	axo18384			64210	MMS19	2	3085	5e-137	3.5e-127	7e-127	1.05449	3.87757	3.69094	3.95828	4.49659	4.29786	4.78571	4.81541	4.56656	6.04053	6.6668	4.59885
RAD51	Homologous recombination	RAD51_HUMAN	axo08632			5888	RAD51	1	1132	7e-159	7e-159	7e-159	27.1377	16.8757	37.7693	41.3739	21.3579	38.7076	66.1812	41.6265	74.972	97.9305	74.2558	67.2197
RAD51B	Homologous recombination	RA51B_HUMAN
RAD51D	Homologous recombination	RA51D_HUMAN
DMC1	Homologous recombination	DMC1_HUMAN
XRCC2	Homologous recombination	XRCC2_HUMAN	axo11075			7516	XRCC2	1	437	2e-49	2e-49	2e-49	0	3.99419	1.96352	2.06054	0.973683	4.05018	2.39162	9.58438	11.2964	3.27116	2.79523	7.37352
XRCC3	Homologous recombination	XRCC3_HUMAN	axo05096
RAD52	Homologous recombination	RAD52_HUMAN
RAD54L	Homologous recombination	RAD54_HUMAN	axo06452			8438	RAD54L	4	2119	2e-102	2.01e-52	4e-19	0.246066	0.593429	1.04244	0.408188	0.385768	2.20641	2.37361	1.89864	4.47558	4.22069	2.03034	1.66934
RAD54B	Homologous recombination	RA54B_HUMAN	axo13193			25788	RAD54B	4	1887	6e-43	1e-07	2e-07	1.13111	1.88223	2.23501	3.04438	1.10831	1.60204	5.16965	4.05212	5.14332	3.95677	5.09074	4.07661
BRCA1	Homologous recombination	BRCA1_HUMAN	axo12855	axo12856		672	BRCA1	2	1188	5e-63	1e-12	2e-12	4.30255	6.22578	8.743	8.2079	3.37264	16.4841	16.5682	17.5477	24.7814	15.4852	11.0312	8.75671
SHFM1 (DSS1)	Homologous recombination	SEM1_HUMAN				7979	SHFM1	1	1093	4e-28	4e-28	4e-28	412.958	339.049	407.655	444.343	431.435	677.646	667.857	866.722	789.69	825.753	656.637	550.123
RAD50	Homologous recombination	RAD50_HUMAN	axo00633	axo00635	axo11330	10111	RAD50	5	3539	1e-106	1e-51	3e-32	8.0118	5.54331	9.87562	11.6735	8.18127	12.6212	12.1819	16.0086	28.9594	33.509	22.2725	28.8679
MRE11A	Homologous recombination	MRE11_HUMAN	axo11214			4361	MRE11A	4	2425	6e-140	1.35e-09	4e-06	3.30053	2.70224	6.09571	4.97673	7.90484	6.88454	12.9443	11.3474	8.27936	12.7252	8.03712	8.54101
NBN (NBS1)	Homologous recombination	NBN_HUMAN				4683	NBN	3	2254	8e-27	1e-23	7e-08	10.7463	9.81122	10.3015	14.9033	9.91933	13.5868	10.7508	17.1638	20.6096	14.4368	18.1172	14.8877
RBBP8 (CtIP)	Homologous recombination	CTIP_HUMAN	axo03375	axo03376		5932	RBBP8	2	1168	5e-29	5e-20	1e-19	0.877685	1.41112	1.04055	0.363988	0	1.07318	1.26742	0.967456	0	1.15568	0.987537	1.86073
MUS81	Homologous recombination	MUS81_HUMAN	axo19228	axo19229		80198	MUS81	4	3365	5e-86	4e-31	2e-19	5.8006	6.52079	8.70979	8.5377	7.59713	7.35319	10.6102	7.50775	9.28645	14.381	12.3974	8.29996
EME1 (MMS4L)	Homologous recombination	EME1_HUMAN	axo01533			146956	EME1	1	458	1e-17	1e-17	1e-17	2.34517	3.77052	3.70713	1.94515	0	9.55843	7.90193	5.17009	10.6638	14.4105	2.64749	4.82271
EME2	Homologous recombination	EME2_HUMAN				197342	EME2	1	767	2e-07	2e-07	2e-07	0	0.516793	1.52431	0	1.51177	1.57211	2.47554	2.83448	1.9488	6.20754	3.37553	3.27096
GIYD1 (SLX1A)	Homologous recombination	SLX1_HUMAN	axo18651	axo18677		548593	GIYD1	1	421	1e-46	1e-46	1e-46	0	0	0	0	1.02997	1.06048	2.50484	4.30203	11.8312	3.426	0.97585	1.10322
GEN1	Homologous recombination	GEN_HUMAN				348654	GEN1	1	1031	2e-28	2e-28	2e-28	0	0	0	0	0	0	0	0	0	0.407169	0.34793	0.393344
FANCA	Fancomi anemia	FANCA_HUMAN	axo15055			2175	FANCA	3	1806	5e-39	6e-37	1e-24	0.262646	0.454061	0.669641	0.468486	0.442754	0	0.815641	1.2452	0.856119	1.73537	0.847366	1.67645
FANCB	Fancomi anemia	FANCB_HUMAN	axo19671			2187	FANCB	1	850	1e-25	1e-25	1e-25	0	0	0.453121	0.95102	1.34818	1.86932	1.65574	3.79162	1.73791	1.50976	0.860071	0.972333
FANCC	Fancomi anemia	FANCC_HUMAN				2176	FANCC	2	1337	3e-31	2.65e-30	5e-30	0.751017	1.88063	3.94733	2.49166	3.23785	2.44879	3.97651	4.13916	0	4.94444	5.83905	2.86593
BRCA2 (FANCD1)	Fancomi anemia	BRCA2_HUMAN	axo07393			675	BRCA2	4	2117	1e-53	5e-22	5e-15	0.246342	0.594094	0.38551	1.8389	1.1586	1.00404	2.37153	1.08615	0.746766	1.9462	1.29348	0.626705
FANCD2	Fancomi anemia	FACD2_HUMAN	axo19688			2177	FANCD2	5	2751	4e-60	2e-31	1e-11	0	0.453963	0.446332	1.0929	1.03287	1.0741	1.81215	1.45243	3.42374	2.73965	2.25916	0.957765
FANCE	Fancomi anemia	FANCE_HUMAN	axo18197
FANCF	Fancomi anemia	FANCF_HUMAN	axo18484			2188	FANCF	1	431	4e-13	4e-13	4e-13	0	0	0	1.04803	0	0	1.21643	1.3928	0	2.21837	2.84342	2.14304
FANCG (XRCC9)	Fancomi anemia	FANCG_HUMAN
FANCI (KIAA1794)	Fancomi anemia	FANCI_HUMAN	axo05340			55215	FANCI	7	3942	3e-52	5e-33	3e-12	20.017	22.0169	19.0306	21.8428	15.7287	20.119	22.0475	24.2607	25.3904	27.1909	28.1328	25.2147
BRIP1 (FANCJ)	Fancomi anemia	FANCJ_HUMAN	axo19710
FANCL	Fancomi anemia	FANCL_HUMAN	axo16534			55120	FANCL	1	599	3e-46	3e-46	3e-46	3.40868	5.17213	4.0412	5.65451	7.29447	7.64119	4.9223	5.636	2.58329	15.7092	8.94907	7.22654
FANCM	Fancomi anemia	FANCM_HUMAN	axo17904			57697	FANCM	1	381	4e-40	4e-40	4e-40	0	0	0	1.22388	0	0	0	0	0	0	0	0
PALB2 (FANCN)	Fancomi anemia	PALB2_HUMAN				79728	PALB2	1	574	7e-08	7e-08	7e-08	0	0	0	0	0	0	0	0.98716	0	0.786143	0.671766	0
RAD51C (FANCO)	Fancomi anemia	RA51C_HUMAN				5889	RAD51C	1	725	3e-75	3e-75	3e-75	0.684923	1.1012	1.62403	1.70428	3.75823	2.7916	4.61561	5.28484	0	9.01861	3.59636	8.71238
BTBD12 (SLX4) (FANCP)	Fancomi anemia	SLX4_HUMAN	axo19949	axo19950	axo24006	84464	BTBD12	4	2615	4e-39	1e-19	9e-14	0.770425	1.08384	1.21785	0.958518	1.66076	2.98309	2.40121	1.69845	4.67097	3.55056	1.44475	0.816666
FAAP20 (C1orf86)	Fancomi anemia	FAP20_HUMAN	axo02724			199990	C1orf86	1	1238	6e-10	6e-10	6e-10	4.18781	5.20283	4.56771	3.15772	3.58113	6.51711	10.2622	8.64479	3.46228	5.68133	5.99704	5.81127
FAAP24 (C19orf40)	Fancomi anemia	FAP24_HUMAN	axo01409			91442	C19orf40	1	666	1e-22	1e-22	1e-22	10.5895	6.72412	10.1342	11.8861	10.0508	18.4447	14.5148	17.459	22.8641	12.5796	11.8979	11.628
XRCC6 (Ku70)	Non-homologous end-joining	XRCC6_HUMAN	axo07303			2547	XRCC6	4	3163	5e-87	3e-46	7e-06	20.0988	22.5789	26.7207	28.8514	22.1591	39.8666	33.9895	45.4135	39.5514	39.1423	31.2209	28.572
XRCC5 (Ku80)	Non-homologous end-joining	XRCC5_HUMAN	axo18039	axo23217		7520	XRCC5	2	2142	4e-52	4e-17	8e-17	26.8728	22.8442	26.2627	31.4125	29.108	28.6608	26.8172	24.2421	39.1259	40.8168	36.5241	30.854
PRKDC	Non-homologous end-joining	PRKDC_HUMAN	axo04793			5591	PRKDC	4	2097	6e-82	1.5e-49	2e-31	0	0.200275	1.18145	0	0.195288	0.406166	0.71952	0.823845	0	0.656084	0	0.422538
LIG4	Non-homologous end-joining	DNLI4_HUMAN	axo03492			3981	LIG4	4	2222	9e-42	2e-25	5e-15	10.2369	7.90014	9.56388	7.91376	7.47727	18.2198	17.9832	18.2107	16.2214	20.8969	13.9282	13.6134
XRCC4	Non-homologous end-joining	XRCC4_HUMAN
DCLRE1C (Artemis)	Non-homologous end-joining	DCR1C_HUMAN				64421	DCLRE1C	1	856	2e-09	2e-09	2e-09	1.80894	0.457291	1.34881	4.71819	7.58037	3.24591	2.19052	4.38922	1.72442	8.98827	4.26698	2.89436
NHEJ1 (XLF, Cernunnos)	Non-homologous end-joining	NHEJ1_HUMAN
NUDT1 (MTH1)	Modulation of nucleotide pools	8ODP_HUMAN	axo03191			4521	NUDT1	1	1025	2e-43	2e-43	2e-43	10.3582	7.50501	15.6173	13.2606	9.44038	14.33	13.9218	28.4591	33.565	35.4445	29.0971	23.9053
DUT	Modulation of nucleotide pools	DUT_HUMAN				1854	DUT	7	4277	8e-58	7e-09	1e-05	48.4751	44.7529	54.8716	52.0382	47.0443	49.7366	56.9784	51.4084	77.4505	84.0419	63.897	49.9678
RRM2B (p53R2)	Modulation of nucleotide pools	RIR2B_HUMAN	axo15267			50484	RRM2B	2	779	3e-72	4e-14	8e-14	2.15198	4.99955	6.14579	3.78995	2.34475	8.25643	6.43608	11.6786	4.34903	10.8117	6.87116	3.67415
POLB	DNA polymerases (catalytic subunits)	DPOLB_HUMAN	axo08431			5423	POLB	2	1632	2e-119	5e-40	1e-39	6.89875	7.74005	11.211	13.1681	7.97052	10.5038	9.25466	9.58811	10.9111	11.601	9.89962	7.1195
POLG	DNA polymerases (catalytic subunits)	DPOG1_HUMAN	axo05495			5428	POLG	5	2711	1e-51	2e-37	1e-16	5.87379	11.5129	17.686	11.391	7.54971	7.59814	13.6048	12.0773	15.8668	24.3147	10.3476	12.4535
POLD1	DNA polymerases (catalytic subunits)	DPOD1_HUMAN	axo08433			5424	POLD1	3	2553	6e-100	4e-45	3e-30	1.33596	1.07396	1.81012	1.10808	2.09443	3.60464	6.42877	5.04891	4.62839	10.6048	6.44213	4.90227
POLE	DNA polymerases (catalytic subunits)	DPOE1_HUMAN	axo11847			5426	POLE	4	2622	1e-132	1.5e-57	1e-55	0.576053	0.926165	1.97295	1.27412	1.20414	2.66092	3.6971	3.17486	4.0746	6.40518	3.45681	2.93101
PCNA	DNA polymerases (catalytic subunits)	PCNA_HUMAN	axo02759	axo02761		5111	PCNA	2	2074	3e-126	4.5e-69	9e-69	355.344	295.624	346.604	252.396	373.229	967.014	943.674	752.587	956.942	1123.89	666.439	499.686
REV3L (POLZ)	DNA polymerases (catalytic subunits)	REV3L_HUMAN	axo08677	axo08678	axo08679	5980	REV3L	9	6037	3e-73	3e-57	9e-08	5.31156	3.5362	4.19483	2.86188	2.47599	5.28582	6.96193	5.42786	6.04753	6.10297	5.29984	4.36965
MAD2L2 (REV7)	DNA polymerases (catalytic subunits)	MD2L2_HUMAN	axo05556			10459	MAD2L2	1	1389	4e-111	4e-111	4e-111	20.8749	26.2706	34.4084	25.3374	31.3066	33.7583	31.0876	22.2678	31.6404	31.0334	23.2351	23.6982
REV1L (REV1)	DNA polymerases (catalytic subunits)	REV1_HUMAN	axo03269	axo15709		51455	REV1	5	3248	1e-94	8e-49	3e-12	0.92973	1.87162	1.91621	2.0508	1.82501	2.74303	3.00491	4.10272	3.29363	6.36015	2.67549	3.01286
POLH	DNA polymerases (catalytic subunits)	POLH_HUMAN	axo12146			5429	POLH	2	1026	3e-45	5e-07	1e-06	0.511303	0.822061	2.82884	1.27227	2.01199	6.25188	5.41453	2.2544	4.64992	6.28366	4.60238	3.90233
POLI (RAD30B)	DNA polymerases (catalytic subunits)	POLI_HUMAN	axo12773			11201	POLI	2	1339	5e-83	2.5e-47	5e-47	1.45824	0.602704	0.592572	0.621852	0.587696	1.52788	1.08265	2.47926	2.27277	0.987203	0.562382	1.27158
POLQ	DNA polymerases (catalytic subunits)	DPOLQ_HUMAN	axo03282			10721	POLQ	4	2155	4e-93	1e-30	1e-20	0.723621	0.387807	1.33451	1.00032	0	2.35946	1.85767	2.36631	2.1936	5.08169	1.80931	2.04547
POLK (DINB1)	DNA polymerases (catalytic subunits)	POLK_HUMAN	axo15615			51426	POLK	3	1190	2e-50	2e-30	1e-23	0.46729	0.375649	0.369334	2.3255	0	1.52366	1.34958	3.09051	2.83311	2.87139	2.10311	1.98135
POLL	DNA polymerases (catalytic subunits)	DPOLL_HUMAN	axo13311			27343	POLL	1	507	1e-33	1e-33	1e-33	0	0	0	0	0	0.84538	0	1.14315	0	0.910369	0.777918	0
POLM	DNA polymerases (catalytic subunits)	DPOLM_HUMAN				27434	POLM	1	818	6e-71	6e-71	6e-71	1.79478	4.3284	5.67418	3.47349	2.34479	5.36443	3.45565	3.9567	5.44072	7.35231	5.3851	4.5457
POLN	DNA polymerases (catalytic subunits)	DPOLN_HUMAN
FEN1 (Dnase IV)	Editing and processing nucleases	FEN1_HUMAN	axo09781			2237	FEN1	2	1549	4e-160	2e-28	4e-28	22.3008	17.889	20.6063	26.3582	31.4427	82.1564	102.585	75.9567	99.236	79.6274	44.4338	37.9442
FAN1 (MTMR15)	Editing and processing nucleases	FAN1_HUMAN				22909	MTMR15	3	2097	5e-80	4e-47	2e-10	3.3098	3.0624	3.57323	2.16501	4.84945	2.71159	5.27314	7.86844	12.2983	9.60813	6.78415	6.52961
TREX1 (Dnase III)	Editing and processing nucleases	TREX1_HUMAN	axo15764			11277	TREX1	3	1326	1e-18	2e-13	4e-11	0.477691	0.347907	0	3.03084	4.27894	1.58753	3.168	0	1.81938	0.3584	1.01371	3.77391
TREX2	Editing and processing nucleases	TREX2_HUMAN	axo00407	axo00408		11219	TREX2	4	3291	1e-41	1.55e-21	2e-20	8.72753	15.8418	44.3538	24.7376	67.822	21.5283	17.8597	19.609	28.6191	15.0015	24.6157	38.122
EXO1 (HEX1)	Editing and processing nucleases	EXO1_HUMAN	axo11637			9156	EXO1	1	1692	4e-52	4e-52	4e-52	6.55891	3.81827	4.96799	5.66681	3.856	11.5842	8.1559	12.875	14.9121	20.8448	10.8565	10.9596
APTX (Aprataxin)	Editing and processing nucleases	APTX_HUMAN	axo02318			54840	APTX	4	1760	2e-42	1e-13	7e-07	0.615855	0.247539	0	0.255403	0.724126	0.502019	1.4822	1.35769	0.933458	2.43275	2.07881	1.82789
SPO11	Editing and processing nucleases	SPO11_HUMAN
ENDOV	Editing and processing nucleases	ENDOV_HUMAN
UBE2A (RAD6A)	Ubiquitination and modification	UBE2A_HUMAN	axo09067			7319	UBE2A	3	2760	2e-117	8e-89	2e-36	52.8522	35.5724	57.3343	74.1328	127.98	119.971	110.885	113.847	126.949	120.965	102.298	109.491
UBE2B (RAD6B)	Ubiquitination and modification	UBE2B_HUMAN	axo09068			7320	UBE2B	3	2730	9e-100	2e-86	2e-77	107.674	82.7622	103.704	121.41	87.6922	120.024	120.916	139.659	121.719	107.265	104.171	104.758
RAD18	Ubiquitination and modification	RAD18_HUMAN	axo17379			56852	RAD18	2	1082	9e-50	2.5e-45	5e-45	2.88026	3.08722	3.41473	1.59265	2.63405	2.34787	9.24274	3.70401	5.82086	9.33808	6.48152	5.69919
SHPRH	Ubiquitination and modification	SHPRH_HUMAN	axo04376			257218	SHPRH	2	976	3e-54	1e-15	2e-15	0	0	0	0.450267	0	0	0	0	0	0	0	0
HLTF (SMARCA3)	Ubiquitination and modification	HLTF_HUMAN	axo08808			6596	HLTF	6	4140	2e-76	4.5e-43	1e-08	21.124	8.92936	11.601	15.4178	6.62489	16.9398	30.5993	39.7046	36.6002	41.6785	26.5428	24.3924
RNF168	Ubiquitination and modification	RN168_HUMAN	axo01595			165918	RNF168	3	2501	1e-46	2e-26	2e-16	7.59748	6.59255	9.56825	9.84993	9.79257	20.2316	25.1772	22.3429	30.5247	27.066	18.2319	14.0297
SPRTN (C1orf124)	Ubiquitination and modification	SPRTN_HUMAN	axo19694			83932	C1orf124	2	1476	2e-30	1.5e-10	3e-10	12.0168	8.78049	7.69106	12.1971	8.87232	20.0317	16.1669	26.3475	31.4216	22.3259	14.0672	12.2399
RNF8	Ubiquitination and modification	RNF8_HUMAN	axo02843	axo09680		9025	RNF8	4	2393	4e-47	1.5e-37	7e-20	2.34688	0.85756	2.69806	2.12353	4.01378	3.30441	4.51251	3.7628	3.88057	6.128	4.78832	5.4278
RNF4	Ubiquitination and modification	RNF4_HUMAN	axo08699	axo08700		6047	RNF4	2	1293	1e-44	1e-20	2e-20	28.6306	23.8878	25.6325	37.3001	41.4722	38.1595	47.35	47.4159	48.8719	46.2682	32.732	33.5998
UBE2V2 (MMS2)	Ubiquitination and modification	UB2V2_HUMAN	axo09081			7336	UBE2V2	3	3127	2e-127	3e-119	2e-89	229.325	186.269	203.762	211.511	142.583	232.324	212.387	287.003	290.476	289.006	250.753	244.521
UBE2N (UBC13)	Ubiquitination and modification	UBE2N_HUMAN	axo09080			7334	UBE2N	2	1773	8e-166	2e-17	4e-17	307.041	214.052	234.744	342.695	263.748	357.248	382.068	447.847	383.818	447.023	382.4	350.347
H2AFX (H2AX)	Chromatin Structure and modication	H2AX_HUMAN	axo07913			3014	H2AFX	7	3202	1e-80	9e-47	1e-35	515.203	172.108	168.549	202.481	231.001	632.35	890.574	840.602	1200.86	1138.98	1083.22	720.427
CHAF1A (CAF1)	Chromatin Structure and modication	CAF1A_HUMAN	axo11111	axo11112	axo11113	10036	CHAF1A	2	2201	9e-115	5e-20	1e-19	4.75373	4.09071	5.78101	3.40521	7.80323	15.5777	24.5379	18.3398	26.201	24.4743	18.0462	10.6315
SETMAR (METNASE)	Chromatin Structure and modication	SETMR_HUMAN	axo12158			6419	SETMAR	1	725	8e-27	8e-27	8e-27	2.73969	3.85421	2.70672	1.70428	4.29512	5.02488	8.56526	10.5697	8.30516	7.81612	12.8441	8.71238
BLM	Genes defective in diseases associated with sensitivity to DNA damaging agents	BLM_HUMAN				641	BLM	5	2699	3e-85	2e-37	4e-06	0.770088	0.464299	2.1303	0.479049	0.754562	2.66791	3.33613	2.97099	2.93559	4.25373	3.02688	1.30609
WRN	Genes defective in diseases associated with sensitivity to DNA damaging agents	WRN_HUMAN				7486	WRN	2	1197	2e-33	3e-28	6e-28	8.55983	7.54287	10.4499	16.9552	10.6982	19.4692	18.0659	15.514	10.3432	22.8453	23.0822	17.3605
RECQL4	Genes defective in diseases associated with sensitivity to DNA damaging agents	RECQ4_HUMAN
ATM	Genes defective in diseases associated with sensitivity to DNA damaging agents	ATM_HUMAN				472	ATM	4	2100	6e-84	5e-42	3e-17	0.248711	0.399871	0	0.618862	0.584871	0.608215	0.478866	1.0966	0.753947	2.17887	0.932798	0.843642
TTDN1 (C7orf11)	Genes defective in diseases associated with sensitivity to DNA damaging agents	MPLKI_HUMAN	axo00810			136647	C7orf11	3	3156	6e-37	5e-36	7e-20	9.22399	5.16793	7.98262	16.3112	13.3593	23.0404	29.507	26.334	35.2159	27.527	17.5108	17.254
DCLRE1A (SNM1)	Other Identified Genes with Known or Suspected DNA Repair Function	DCR1A_HUMAN	axo14212			9937	DCLRE1A	3	1338	2e-36	2e-34	6e-20	0.403784	0	0.95742	0.669818	0.949542	0.987442	2.33233	3.56067	2.44808	4.60785	1.21152	2.73932
DCLRE1B (SNM1B)	Other Identified Genes with Known or Suspected DNA Repair Function	DCR1B_HUMAN
RPA4	Other Identified Genes with Known or Suspected DNA Repair Function	RFA4_HUMAN
PRPF19 (PSO4)	Other Identified Genes with Known or Suspected DNA Repair Function	PRP19_HUMAN	axo13826	axo13827		27339	PRPF19	4	2829	6e-160	2e-50	5e-29	0.704398	2.40659	2.08777	1.31456	3.1749	4.0208	4.91638	4.27045	5.87215	4.63752	3.56652	2.5387
RECQL (RECQ1)	Other Identified Genes with Known or Suspected DNA Repair Function	RECQ1_HUMAN	axo20222			5965	RECQL	3	2316	2e-103	2e-67	3e-12	10.8388	5.47245	10.3641	8.9988	16.8423	33.8152	43.5831	39.8543	35.4687	49.4008	26.1716	25.5466
RECQL5	Other Identified Genes with Known or Suspected DNA Repair Function	RECQ5_HUMAN	axo09891
HELQ (HEL308)	Other Identified Genes with Known or Suspected DNA Repair Function	HELQ_HUMAN	axo00649			113510	HELQ	2	1312	6e-88	2e-50	4e-50	0.3837	0.616904	3.03267	2.22776	0.902313	4.69164	3.32448	2.53767	5.53663	3.88017	2.59034	4.54236
RDM1 (RAD52B)	Other Identified Genes with Known or Suspected DNA Repair Function	RDM1_HUMAN	axo01289			201299	RDM1	2	1135	3e-34	1e-17	2e-17	1.36136	4.01274	8.24923	6.77491	3.50731	2.54867	6.11604	8.07326	13.7562	9.95863	9.5309	4.23301
OBFC2B (SSB1)	Other Identified Genes with Known or Suspected DNA Repair Function	SOSB1_HUMAN	axo18691			79035	OBFC2B	2	1323	3e-69	3e-22	6e-22	3.04042	3.0552	3.30422	3.46118	6.55406	8.05486	10.9689	15.6552	13.8252	15.3464	8.26731	5.80122
ATR	Other Identified Genes with Known or Suspected DNA Repair Function	ATR_HUMAN	axo00448			545	ATR	1	330	6e-18	6e-18	6e-18	0	0	0	0	0	0	0	0	0	1.56274	0	0
ATRIP	Other Identified Genes with Known or Suspected DNA Repair Function	ATRIP_HUMAN				84126	ATRIP	2	1496	8e-72	4.5e-11	9e-11	2.97555	0.797337	7.05539	3.56489	2.59161	4.85109	6.36249	3.64433	4.00895	8.39905	7.19194	7.85031
MDC1	Other Identified Genes with Known or Suspected DNA Repair Function	MDC1_HUMAN	axo13934			9656	MDC1	1	488	4e-25	4e-25	4e-25	2.17146	2.61842	3.43253	1.80107	4.25535	10.6205	12.9295	4.78712	6.5826	8.5777	2.44324	1.84143
RAD1	Other Identified Genes with Known or Suspected DNA Repair Function	RAD1_HUMAN	axo08600			5810	RAD1	2	985	2e-59	5e-27	1e-26	0.536899	0.431607	1.6974	0.890638	2.94601	3.93892	5.29276	8.87721	3.25513	5.65562	4.83278	3.18709
RAD9A	Other Identified Genes with Known or Suspected DNA Repair Function	RAD9A_HUMAN	axo10245	axo10246		5883	RAD9A	2	1146	9e-15	1e-08	2e-08	1.79478	1.4428	6.73809	4.83807	4.92405	10.4241	13.3907	9.39716	16.3222	14.1795	9.08735	8.37099
HUS1	Other Identified Genes with Known or Suspected DNA Repair Function	HUS1_HUMAN	axo10152			3364	HUS1	2	1346	4e-58	2e-50	4e-50	10.434	7.48911	8.09364	10.1997	9.8527	15.1882	25.4529	23.0107	42.8699	21.5929	12.8581	9.33172
RAD17 (RAD24)	Other Identified Genes with Known or Suspected DNA Repair Function	RAD17_HUMAN	axo00527			5884	RAD17	3	2072	1e-92	1e-41	2e-22	3.6181	3.67835	6.10441	3.98927	4.72688	10.4406	13.2475	14.2989	26.3232	18.2094	9.22748	7.22052
CHEK1	Other Identified Genes with Known or Suspected DNA Repair Function	CHK1_HUMAN	axo05386			1111	CHEK1	2	1660	8e-123	2e-56	4e-56	0.882972	1.41962	3.02414	2.19709	0.922848	4.31857	9.15205	3.24428	7.13776	8.26766	4.63627	2.49591
CHEK2	Other Identified Genes with Known or Suspected DNA Repair Function	CHK2_HUMAN	axo13857			11200	CHEK2	1	476	2e-42	2e-42	2e-42	1.11888	1.79891	4.66929	0.928031	0	1.82413	3.23143	2.46664	0	3.92872	1.67856	1.89766
TP53	Other Identified Genes with Known or Suspected DNA Repair Function	P53_HUMAN	axo05486	axo05487		7157	TP53	2	3086	9e-91	4e-78	8e-78	38.0207	35.7614	47.7349	51.1227	48.4493	57.2315	60.4257	57.8116	66.4434	65.8441	53.114	45.6637
TP53BP1 (53BP1)	Other Identified Genes with Known or Suspected DNA Repair Function	TP53B_HUMAN	axo06381			7158	TP53BP1	7	5237	4e-122	9e-19	8e-06	0.849975	1.36657	1.3421	1.80243	1.62866	1.61668	2.6221	3.74765	2.86292	2.34367	2.12311	2.24246
RIF1	Other Identified Genes with Known or Suspected DNA Repair Function	RIF1_HUMAN	axo16631			55183	RIF1	5	3197	5e-64	1e-46	2e-06	0.790295	1.27062	0.749555	1.04879	0.495591	1.41727	2.58981	1.91648	3.83315	2.35871	2.01554	2.01055
TOPBP1	Other Identified Genes with Known or Suspected DNA Repair Function	TOPB1_HUMAN	axo12641			11073	TOPBP1	4	3082	0	1.5e-35	6e-24	2.71987	4.62617	7.83553	4.80895	3.38417	9.43418	8.39708	7.4696	9.69438	6.87775	5.39734	6.37302
CLK2	Other Identified Genes with Known or Suspected DNA Repair Function	CLK2_HUMAN	axo09704	axo09705		1196	CLK2	4	3078	5e-156	1e-63	4e-06	38.2986	45.8155	34.1772	26.7613	21.0689	42.8132	34.6023	39.7606	55.3385	57.3414	45.8817	40.1366
PER1	Other Identified Genes with Known or Suspected DNA Repair Function	PER1_HUMAN	axo08369
APBB1	Other Identified Genes with Known or Suspected DNA Repair Function	APBB1_HUMAN	axo06977			322	APBB1	2	1370	3e-63	1.5e-06	3e-06	9.32032	5.18192	10.8247	5.16176	4.37725	7.67195	9.06406	10.0482	15.1676	7.07553	10.4184	8.10199
BRCC3	Other Identified Genes with Known or Suspected DNA Repair Function	BRCC3_HUMAN	axo19511			79184	BRCC3	1	742	2e-109	2e-109	2e-109	6.67254	2.14559	13.195	12.7291	18.3169	15.7736	26.3369	15.4455	20.2273	24.4074	15.8462	16.9809
DDX11	Other Identified Genes with Known or Suspected DNA Repair Function	DDX11_HUMAN	axo10042	axo19378		1663	DDX11	2	1622	2e-112	2e-38	4e-38	1.51003	3.39891	4.31804	1.75344	3.31427	1.23091	3.19814	5.65922	2.74652	5.03704	6.7961	5.63432
DHX9	Other Identified Genes with Known or Suspected DNA Repair Function	DHX9_HUMAN	axo07141			1660	DHX9	5	4987	0	8e-75	3e-42	20.7501	12.5398	17.6896	18.6817	21.7893	37.641	46.0242	54.2897	53.9722	60.1291	41.7924	31.4705
DTX3L	Other Identified Genes with Known or Suspected DNA Repair Function	DTX3L_HUMAN	axo00670			151636	DTX3L	4	2615	3e-37	2e-14	4e-13	23.4209	17.8493	19.3425	28.0478	19.5577	20.2552	22.6771	17.3582	14.0012	20.95	24.7645	40.2633
EYA2	Other Identified Genes with Known or Suspected DNA Repair Function	EYA2_HUMAN	axo01987			2139	EYA2	2	1979	3e-155	1.5e-40	3e-40	8.97388	20.3766	20.8488	17.3004	13.7303	17.2894	21.7216	30.6243	33.2619	32.9896	29.8582	26.1146
EYA3	Other Identified Genes with Known or Suspected DNA Repair Function	EYA3_HUMAN	axo07785			2140	EYA3	2	1594	3e-88	5e-51	1e-50	3.07927	4.95079	6.32782	4.34186	4.83233	7.27927	5.63238	5.46471	11.2015	12.7071	10.1631	7.83382
EYA4	Other Identified Genes with Known or Suspected DNA Repair Function	EYA4_HUMAN	axo01985	axo01986		2070	EYA4	6	2986	7e-91	3.01e-81	9e-28	2.85076	4.53224	4.05095	3.37157	2.218	1.44068	1.19271	1.16888	0	3.41625	6.49466	3.14738
FOXM1	Other Identified Genes with Known or Suspected DNA Repair Function	FOXM1_HUMAN	axo03371			2305	FOXM1	3	1478	1e-56	5e-29	5e-16	0.715574	0.287621	1.9795	0.593517	0.841376	6.41636	7.23325	5.12697	6.50762	4.7111	2.14703	2.42727
HMGB1	Other Identified Genes with Known or Suspected DNA Repair Function	HMGB1_HUMAN				3146	HMGB1	2	820	3e-23	1e-09	2e-09	6.72355	5.40499	3.71988	6.8203	12.1219	13.7019	14.8873	9.63462	20.3819	7.0825	9.21426	12.5437
PARP9	Other Identified Genes with Known or Suspected DNA Repair Function	PARP9_HUMAN	axo06885	axo06887		83666	PARP9	4	3395	4e-57	1.5e-18	9e-07	23.9513	18.9818	22.7792	24.8836	24.5622	22.3163	23.5692	22.9435	12.6204	25.7003	42.2715	54.7562
SIRT1	Other Identified Genes with Known or Suspected DNA Repair Function	SIR1_HUMAN	axo13040			23411	SIRT1	3	2075	9e-86	3e-60	2e-25	5.29783	2.70825	5.15796	8.18914	9.06069	5.69266	10.6618	11.9449	13.87	12.1316	12.4655	11.8892
SMCHD1	Other Identified Genes with Known or Suspected DNA Repair Function	SMHD1_HUMAN	axo14865			23347	SMCHD1	4	3230	4e-141	4e-51	1e-17	2.57945	2.19557	3.59656	4.45764	3.67996	1.85529	4.28722	2.50878	2.75979	5.06137	5.1217	6.82087
UIMC1	Other Identified Genes with Known or Suspected DNA Repair Function	UIMC1_HUMAN	axo15686			51720	UIMC1	1	1037	3e-12	3e-12	3e-12	1.84369	1.48212	0.364301	1.14691	1.80652	2.63007	1.33119	3.55647	0	1.21382	2.07445	0.39087
WRAP53	Other Identified Genes with Known or Suspected DNA Repair Function	TCAB1_HUMAN	axo06597			55135	WRAP53	1	865	8e-40	8e-40	8e-40	0.562302	0	0.444429	0	0.687604	3.21772	3.61606	0	0	4.61024	0.552541	2.40805

## Sheet: DDR Analysis - Figure 1b
Genes selected for the DNA damage response expression analysis		RNA-seq Gene Expression								Relative Response to 0hr
geneid	gene_type	0hr	3d	5d	7d	10d	14d	21d	28d	3d	5d	7d	10d	14d	21d	28d
APBB1	amyloid beta (A4) precursor protein-binding, family B, member 1 (Fe65)	9.32032	7.67195	9.06406	10.0482	15.1676	7.07553	10.4184	8.10199	0.823143	0.972505	1.07809	1.62737	0.759151	1.11781	0.869283
BRCA1	breast cancer 1, early onset	4.30255	16.4841	16.5682	17.5477	24.7814	15.4852	11.0312	8.75671	3.83124	3.85079	4.07844	5.7597	3.59907	2.56387	2.03524
BRCC3	BRCA1/BRCA2-containing complex, subunit 3	6.67254	15.7736	26.3369	15.4455	20.2273	24.4074	15.8462	16.9809	2.36396	3.94706	2.31479	3.03142	3.65789	2.37484	2.5449
DDX11	DEAD/H (Asp-Glu-Ala-Asp/His) box polypeptide 11 (CHL1-like helicase homolog, S. cerevisiae)	1.51003	1.23091	3.19814	5.65922	2.74652	5.03704	6.7961	5.63432	0.815158	2.11793	3.74776	1.81885	3.33573	4.50064	3.73127
DHX9	DEAH (Asp-Glu-Ala-His) box polypeptide 9	20.7501	37.641	46.0242	54.2897	53.9722	60.1291	41.7924	31.4705	1.81401	2.21802	2.61635	2.60105	2.89777	2.01408	1.51664
DTX3L	deltex 3-like (Drosophila)	23.4209	20.2552	22.6771	17.3582	14.0012	20.95	24.7645	40.2633	0.864831	0.968239	0.741139	0.597808	0.894498	1.05737	1.71911
ERCC8	excision repair cross-complementing rodent repair deficiency, complementation group 8	2.71992	7.39054	6.98256	13.9912	8.24522	11.938	10.8812	9.99498	2.71719	2.56719	5.14398	3.03142	4.38911	4.00057	3.67473
EYA2	eyes absent homolog 2 (Drosophila)	8.97388	17.2894	21.7216	30.6243	33.2619	32.9896	29.8582	26.1146	1.92664	2.42053	3.4126	3.70653	3.67618	3.32723	2.91007
EYA3	eyes absent homolog 3 (Drosophila)	3.07927	7.27927	5.63238	5.46471	11.2015	12.7071	10.1631	7.83382	2.36396	1.82912	1.77467	3.63771	4.12664	3.30047	2.54405
EYA4	eyes absent homolog 4 (Drosophila)	2.85076	1.44068	1.19271	1.16888	0	3.41625	6.49466	3.14738	0.505367	0.418382	0.410024	0	1.19837	2.27822	1.10405
FOXM1	forkhead box M1	0.715574	6.41636	7.23325	5.12697	6.50762	4.7111	2.14703	2.42727	8.96673	10.1083	7.16483	9.09426	6.58367	3.00043	3.39206
H2AFX	H2A histone family, member X	515.203	632.35	890.574	840.602	1200.86	1138.98	1083.22	720.427	1.22738	1.72859	1.6316	2.33086	2.21074	2.10251	1.39834
HMGB1	high-mobility group box 1	6.72355	13.7019	14.8873	9.63462	20.3819	7.0825	9.21426	12.5437	2.03789	2.2142	1.43297	3.03142	1.05339	1.37045	1.86563
MAD2L2	MAD2 mitotic arrest deficient-like 2 (yeast)	20.8749	33.7583	31.0876	22.2678	31.6404	31.0334	23.2351	23.6982	1.61717	1.48923	1.06672	1.51571	1.48663	1.11306	1.13525
MGMT	O-6-methylguanine-DNA methyltransferase	2.48817	0	2.76017	1.57625	0	1.88291	0	1.81897	0	1.10931	0.633495	0	0.756743	0	0.731048
MMS19	MMS19 nucleotide excision repair homolog (S. cerevisiae)	1.05449	4.29786	4.78571	4.81541	4.56656	6.04053	6.6668	4.59885	4.07579	4.53843	4.5666	4.3306	5.72842	6.32233	4.36122
PARP1	poly (ADP-ribose) polymerase 1	17.029	34.0881	43.5512	49.5637	63.3217	74.869	28.618	20.3705	2.00177	2.55748	2.91055	3.71847	4.39657	1.68055	1.19622
PARP9	poly (ADP-ribose) polymerase family, member 9	23.9513	22.3163	23.5692	22.9435	12.6204	25.7003	42.2715	54.7562	0.931734	0.984047	0.957923	0.526919	1.07302	1.76489	2.28615
PCNA	proliferating cell nuclear antigen	355.344	967.014	943.674	752.587	956.942	1123.89	666.439	499.686	2.72135	2.65567	2.11791	2.693	3.16284	1.87548	1.4062
RIF1	RAP1 interacting factor homolog (yeast)	0.790295	1.41727	2.58981	1.91648	3.83315	2.35871	2.01554	2.01055	1.79335	3.27702	2.42502	4.85027	2.9846	2.55036	2.54405
RNF168	ring finger protein 168	7.59748	20.2316	25.1772	22.3429	30.5247	27.066	18.2319	14.0297	2.66293	3.3139	2.94083	4.01774	3.5625	2.39973	1.84663
RNF8	ring finger protein 8	2.34688	3.30441	4.51251	3.7628	3.88057	6.128	4.78832	5.4278	1.408	1.92277	1.60332	1.6535	2.61112	2.04029	2.31277
SETMAR	SET domain and mariner transposase fusion gene	2.73969	5.02488	8.56526	10.5697	8.30516	7.81612	12.8441	8.71238	1.8341	3.12636	3.85799	3.03142	2.85292	4.68817	3.18006
SIRT1	sirtuin (silent mating type information regulation 2 homolog) 1 (S. cerevisiae)	5.29783	5.69266	10.6618	11.9449	13.87	12.1316	12.4655	11.8892	1.07453	2.01247	2.25467	2.61805	2.28992	2.35295	2.24416
SMCHD1	structural maintenance of chromosomes flexible hinge domain containing 1	2.57945	1.85529	4.28722	2.50878	2.75979	5.06137	5.1217	6.82087	0.719257	1.66207	0.972602	1.06991	1.96219	1.98558	2.64431
UBE2N	ubiquitin-conjugating enzyme E2N (UBC13 homolog, yeast)	307.041	357.248	382.068	447.847	383.818	447.023	382.4	350.347	1.16352	1.24436	1.45859	1.25006	1.45591	1.24544	1.14104
UBE2V2	ubiquitin-conjugating enzyme E2 variant 2	229.325	232.324	212.387	287.003	290.476	289.006	250.753	244.521	1.01308	0.926138	1.25151	1.26666	1.26025	1.09344	1.06626
UIMC1	ubiquitin interaction motif containing 1	1.84369	2.63007	1.33119	3.55647	0	1.21382	2.07445	0.39087	1.42653	0.722023	1.92899	0	0.658367	1.12516	0.212004
WRAP53	WD repeat containing, antisense to TP53	0.562302	3.21772	3.61606	0	0	4.61024	0.552541	2.40805	5.72241	6.43082	0	0	8.19886	0.98264	4.28248
XRCC1	X-ray repair complementing defective repair in Chinese hamster cells 1	0.681948	2.00122	2.13234	2.85646	3.30764	3.59178	3.27382	2.19755	2.93457	3.12684	4.18867	4.85027	5.26693	4.80068	3.22246
Average Response		52.9263	82.7116	92.6283	89.1674	107.374	113.811	90.8126	71.5793	1.56277	1.75014	1.68475	2.02875	2.15037	1.71583	1.35243

## Sheet: DDR Analysis Eya2- RNAseq
Annotation	WT D5	WT D14	HET D5	HET D14	KO D5	KO D14	WT Day 0			HET Day 0				KO Day 0				WT Day 5				HET Day 5				KO Day 5				WT Day 14				HET Day 14				KO Day 14
APBB1_HUMAN	1.23565	1.6732	1.2538	1.99486	1.43611	2.43821	4.62899	4.83437	4.1055	4.87387	4.61727	4.57115	3.76766	3.51337	4.89829	4.17827	5.06997	4.87535	6.10327	6.69952	4.67701	7.5397	6.66599	3.34266	4.94818	5.22199	7.79211	5.29006	7.05742	6.87419	10.2085	7.33574	5.8528	7.33574	10.2797	8.04773	9.90509	11.7366	10.6974	9.85987
BRCA1_HUMAN	1.31626	1.93242	1.49648	2.11211	1.51187	2.54715	6.73875	6.0465	8.0248	6.87728	6.43615	6.2652	4.82668	5.45057	8.14141	5.85719	6.17331	9.22274	10.4746	8.80645	8.01818	9.99949	7.86809	9.40461	10.61	10.2403	9.32237	8.99078	10.1844	14.016	14.0725	11.4911	14.0388	11.4911	14.0869	12.4606	13.5081	18.3734	15.8806	14.6943
BRCC3_HUMAN	1.15874	1.36156	1.21998	1.40451	1.47424	1.71518	43.2062	45.1215	59.7672	49.3714	46.2233	46.9448	45.0085	38.7553	41.3903	46.6735	36.7898	53.4092	54.9149	59.345	61.1362	67.8954	61.097	53.1083	64.4805	59.4871	58.8953	64.0312	58.7857	65.6293	69.0859	61.4602	72.6772	61.4602	72.8588	61.3068	67.7865	78.9892	74.8324	56.6431
DDX11_HUMAN	0.618007	0.757576	0.807921	0.770703	0.754917	0.865613	24.6056	12.0669	19.9751	14.7256	16.4755	13.7065	12.868	1.96092	4.60889	19.3405	2.99276	9.71936	9.23519	7.23476	20.4888	11.6871	15.174	17.1525	11.2487	3.33699	3.47128	7.80258	7.20861	15.8304	13.7445	12.5098	15.1351	12.5098	3.8137	15.9734	12.2309	1.09282	1.2873	16.3841
DHX9_HUMAN	0.928205	1.12494	1.15417	1.23479	1.10496	1.43306	82.8716	63.8151	78.9314	61.6236	71.9352	66.0412	42.3279	26.8578	37.2343	76.9349	33.4207	64.4262	68.8045	55.1906	90.8051	63.4626	93.0466	59.4666	56.0183	52.1102	41.0454	58.7518	40.8499	90.9773	96.5781	62.4078	88.4444	62.4078	70.7684	89.904	75.6493	48.5155	58.6711	80.3084
DTX3L_HUMAN	0.774227	0.55709	0.623172	0.487863	0.973874	0.501261	25.623	39.5237	75.6278	49.7932	57.512	64.356	61.536	66.5442	39.0321	38.8177	69.3997	27.0825	29.0903	48.1658	40.9834	40.3906	45.7424	32.8713	34.9249	66.8091	31.6026	54.2719	55.5244	27.5678	27.0856	25.5053	24.4068	25.5053	29.1956	25.1777	33.8898	24.1231	25.8282	30.4236
ERCC8_HUMAN	1.29982	1.50965	1.44403	1.645	1.47788	2.01015	3.32226	4.06444	4.68333	3.54265	3.34717	3.71535	3.88105	2.74579	3.95212	3.68604	3.30485	4.98353	4.85074	5.23492	5.84934	4.75976	5.00477	5.09826	4.78878	5.06155	5.1981	4.78743	5.18326	7.07137	6.07506	6.24497	4.90394	6.24497	6.45625	5.30209	5.82647	6.74344	7.25061	6.64339
EYA2_HUMAN	1.09369	1.26991	0.995679	1.24833	1.27694	1.48153	9.59823	8.65652	6.32251	10.6211	7.16899	13.3542	4.85112	9.174	12.4951	5.58409	9.76843	6.23032	8.08234	13.6374	7.8898	11.896	13.7799	7.92039	10.7821	9.12273	9.44019	14.9794	13.7321	10.7149	11.2025	9.9279	9.76926	9.9279	11.246	10.8661	12.8942	12.5054	15.2087	13.4224
EYA3_HUMAN	1.26236	1.26053	1.45937	1.53776	1.24503	1.40288	13.1447	12.0656	16.5353	13.3302	12.1289	11.0958	11.592	12.962	14.614	11.2508	13.6289	18.5395	18.3344	17.5349	15.8554	18.3781	13.36	17.1662	16.1649	18.5513	16.0244	15.8139	14.9192	18.0352	16.2249	17.3443	18.558	17.3443	21.4231	20.0401	15.2306	19.5315	16.6028	19.0572
EYA4_HUMAN	0.499549	4.67123	0.474434	4.6943	0.612534	4.60473	4.00187	3.55414	1.78851	2.50244	4.10984	3.79056	2.71606	3.62975	4.69312	3.3169	4.05489	1.66223	1.37075	1.5177	1.67338	1.94018	1.49271	1.58568	1.61437	1.83987	3.30696	2.4098	2.05688	13.8206	17.4879	12.9282	13.9638	12.9282	18.2587	12.9634	17.4337	21.5631	17.3882	15.251
FOXM1_HUMAN	1.32773	2.01847	1.6092	2.61511	1.69786	2.86819	6.28994	5.31489	7.98215	6.03303	6.11637	6.71352	2.68506	3.23293	8.28234	5.52009	4.16051	10.1642	10.205	6.59231	7.71338	13.1394	7.85426	7.45426	10.2301	9.43289	8.44515	7.56146	10.5481	15.0839	11.6423	14.6381	11.35	14.6381	16.0243	11.8454	13.8427	15.1402	16.3354	14.1198
H2AX_HUMAN	0.647527	1.21302	0.663508	1.20104	1.82566	1.55661	4.60912	3.07043	16.8794	8.80112	6.43174	7.76504	8.95875	8.40451	3.04566	2.04456	10.8853	4.03471	4.35544	7.31375	5.4996	13.406	8.39289	7.09297	3.58055	10.0173	7.31373	11.6639	15.5148	7.71013	9.19835	10.3323	12.48	10.3323	10.2362	9.77108	8.04177	9.67309	7.07894	11.7107
HMGB1_HUMAN	0.72789	1.42016	1.19407	2.08615	0.872279	1.07348	103.476	57.7803	44.6082	33.3611	56.6815	42.2905	34.9902	9.67671	32.1897	75.0241	17.3168	58.3466	34.4849	25.6914	81.2724	43.57	80.6193	53.779	40.9589	34.6952	22.3327	32.5999	27.4384	73.1449	72.6554	194.071	49.9416	194.071	43.3831	56.6369	54.971	26.7811	26.0363	55.2342
MD2L2_HUMAN	1.02434	0.953476	1.01244	0.954714	1.32439	1.14885	17.4784	21.7118	21.4481	19.9663	20.6788	19.6579	21.4982	17.6332	18.6899	19.7046	19.3621	20.9533	19.9069	21.3246	20.6343	23.2433	19.5855	21.8206	21.466	24.782	25.5952	24.5258	24.9421	19.7784	19.1398	19.4301	18.7413	19.4301	18.5029	20.399	19.7648	23.718	23.55	17.691
MGMT_HUMAN	1.11857	1.14237	0.914637	0.855618	0.935909	0.955788	1.79668	1.83254	2.40036	2.78722	1.92142	2.59067	2.5326	2.36278	2.76349	1.69897	3.12047	1.80501	1.92228	2.93126	2.33409	2.56085	3.35737	2.10824	1.77639	2.48651	2.74956	1.7867	2.28551	2.62128	2.01534	2.55057	1.9968	2.55057	2.02786	1.78893	2.045	2.51276	2.23926	2.37747
MMS19_HUMAN	0.874922	1.1655	1.06759	1.31592	0.898203	1.1432	23.7052	14.0034	23.4649	18.9478	16.1021	16.1962	15.5984	15.2812	20.6827	20.3131	18.8672	17.1037	18.3064	16.6014	19.3513	17.5438	16.9499	16.3587	16.0601	16.0835	16.94	19.8166	14.6546	19.9589	27.7577	18.9939	28.3531	18.9939	22.3973	24.0682	22.5027	19.524	20.9623	23.9425
PARP1_HUMAN	1.52783	2.93091	1.98416	3.77099	1.86262	4.72952	25.3686	20.1544	27.4367	22.8569	18.9818	18.2972	14.771	15.8794	26.0645	20.2196	15.5785	40.1005	40.8724	35.6391	32.0149	40.1412	32.6152	32.5553	40.9283	38.8173	38.629	29.4342	37.923	72.8567	74.0092	64.8144	73.4374	64.8144	73.9899	73.6159	70.0527	98.1691	92.5693	85.0235
PARP9_HUMAN	0.824285	0.579743	1.01295	0.784272	0.919388	0.699031	12.7113	19.7537	26.7709	16.0768	17.9368	15.6925	14.5644	25.1957	15.9164	14.74	19.1705	16.7945	12.5425	18.9681	16.7979	16.1973	17.9831	14.59	16.3181	19.7034	14.0761	15.7331	19.4622	12.2835	10.7107	10.671	12.1236	10.671	12.21	12.4163	15.1084	11.7689	12.0192	15.5442
PCNA_HUMAN	1.17925	2.14811	1.82961	3.27982	2.11915	4.68396	214.01	295.656	365.56	251.828	217.852	162.839	119.634	112.847	224.193	235.855	116.419	307.133	351.317	335.65	382.045	479.39	376.311	391.63	354.87	374.35	342.374	309.565	434.473	609	550.957	800.92	545.9	800.92	564.568	527.305	574.135	873.68	894.261	653.597
RIF1_HUMAN	1.25537	2.04489	1.41706	2.532	1.63085	3.43677	9.0648	9.18427	10.132	9.42509	10.4632	8.32288	5.31249	6.30518	8.32426	9.82734	5.47493	13.3794	11.3003	11.1972	11.6281	15.8383	13.3362	11.2828	12.9367	12.0154	11.6295	10.8676	14.3016	19.622	21.8285	17.6723	18.259	17.6723	23.9727	19.9244	23.3125	28.0426	26.4405	22.6683
RN168_HUMAN	1.31954	2.03047	1.62965	2.76602	1.87551	3.41275	21.3601	25.0587	28.431	22.8759	22.4349	19.0537	16.4442	16.1391	24.5085	25.8059	14.8081	31.4474	31.8973	32.5086	35.8365	39.8708	31.8184	38.2401	34.0558	34.2805	37.8146	34.9061	45.4058	49.586	49.9855	58.4505	44.6182	58.4505	57.5429	50.858	56.6672	79.6235	70.6417	57.7285
RNF8_HUMAN	1.30867	1.58443	1.2964	1.60651	1.37675	1.89483	11.9629	12.55	11.4924	12.3935	13.1104	11.5538	11.4037	10.5802	12.513	10.4531	10.3179	16.1352	15.6054	17.243	13.8418	16.9751	14.6678	13.4434	14.9254	15.4923	14.8298	14.677	15.3912	19.1147	20.9538	16.6423	19.353	16.6423	21.7934	19.3434	20.0744	20.7263	21.413	20.1969
SETMR_HUMAN	0.958368	2.17464	1.43128	3.06087	1.41185	2.70924	0.515738	0.80623	0.598148	0.669345	0.299926	0.39077	0.354213	0.635621	0.556986	0.354845	0.525035	0.670457	0.823007	0.605504	0.354603	0.940094	0.719462	0.845052	0.445156	0.671628	0.800764	0.929102	0.524549	1.32943	1.31316	1.13458	1.79024	1.13458	1.21348	1.86284	1.03621	1.91017	1.35154	0.949433
SIR1_HUMAN	1.33845	1.71042	1.26116	1.59166	1.2105	1.61561	13.0254	11.5314	12.0911	13.0483	14.3026	12.8886	11.6192	15.0303	14.6188	10.336	14.5638	15.5639	12.7044	20.0846	17.0491	17.6302	15.2657	14.1195	14.1236	17.5145	18.9892	14.258	15.2698	23.1262	20.0601	19.9183	20.4734	19.9183	22.8858	19.3799	20.3575	21.9263	22.5239	21.6469
SMHD1_HUMAN	1.25674	2.44305	1.43248	2.72311	1.33946	2.69721	7.06088	4.48147	6.11633	6.07306	5.21369	5.11302	4.25659	5.50727	6.41906	5.42912	5.95374	6.663	7.18057	8.67782	7.06853	8.22059	6.29834	6.48383	7.47882	7.77907	8.31411	6.79014	8.33836	14.7669	15.735	13.1722	13.8474	13.1722	15.0875	14.1309	13.8589	14.4896	16.4945	16.1682
UBE2N_HUMAN	1.08699	1.35055	1.24416	1.50834	1.19732	1.57827	187.447	178.822	169.06	181.948	157.972	147.677	136.011	145.287	158.618	174.584	138.328	192.747	183.72	196.01	203.388	198.597	194.326	209.566	197.051	185.223	200.48	165.489	187.337	241.855	231.966	249.328	240.838	249.328	235.697	234.513	221.074	235.863	247.476	246.788
UB2V2_HUMAN	1.238	1.51437	1.36776	1.72525	1.30856	1.75516	120.895	116.974	95.966	109.745	122.82	95.1003	75.2201	84.0917	97.8823	120.901	76.5109	143.276	129.002	125.987	152.787	146.63	139.744	153.619	138.387	125.99	134.091	112.013	124.354	181.89	158.457	174.314	159.406	174.314	192.674	171.035	157.054	162.352	161.928	175.13
UIMC1_HUMAN	1.12897	1.30508	0.861673	0.963641	1.06152	1.08338	8.43403	8.10514	8.15999	10.0026	9.56119	11.3516	12.2326	12.8522	9.43821	7.14934	13.1494	8.26501	8.98971	11.7184	8.20635	9.44336	10.0548	8.62301	8.90231	10.9826	10.5629	11.4045	12.2593	11.3834	11.7176	10.2217	9.65652	10.2217	11.8721	8.26404	11.2214	13.13	11.6137	9.86134
TCAB1_HUMAN	1.1296	1.37792	1.47489	1.66906	1.3629	1.63492	13.9585	17.8372	19.7358	14.3168	13.9114	12.1043	12.291	9.61855	16.5174	15.42	11.4505	17.1524	22.7478	19.2937	18.4198	22.8288	18.0447	16.1283	21.8025	20.623	18.7528	15.598	17.2687	24.9979	25.2325	21.0932	23.3513	21.0932	22.8351	22.1429	21.7608	25.1819	20.6758	19.1385
XRCC1_HUMAN	1.29542	1.56239	1.26975	1.62236	1.5986	1.9797	13.2636	11.8551	13.2719	14.1487	12.5584	11.6436	13.8716	11.1928	13.3059	11.7443	11.3257	18.4122	16.6201	16.2504	15.0267	20.8135	17.2237	14.2489	18.3335	18.996	20.5676	17.2383	19.2414	20.7008	22.238	17.2053	19.8305	17.2053	22.6512	20.6981	24.1688	26.5877	23.3451	20.6959
Average Response	1.09183	1.62627	1.23012	1.85876	1.32325	2.05521
