# Supplementary material for: Eya2 promotes cell cycle progression by regulating DNA damage response during vertebrate limb regeneration
Source: eLife. 2020 Mar 6;9:e51217. doi: 10.7554/eLife.51217 (PMC7093111; doi:10.7554/eLife.51217)
Supplement: Supplementary file 2. — This file contains data used for the eya2 co-expression correlation analysis during regeneration presented in Figure 2d and Figure 2—figure supplement 1. +Correlation Eya2: Gene expression over time, R (Vitale et al., 2017) and slope values for genes positively correlated with eya2. GO Enrichment +Correlation: Enriched GO Terms from the +Correlation Eya2 dataset. -Correlation Eya2: Gene expression over, R2 and slope values for genes negatively correlated with eya2. GO Enrichment -Correlation: Enriched GO Terms from the – Correlation Eya2 dataset. [file elife-51217-supp2.xlsx]

## Sheet: +Correlation Eya2
geneid	symbol	gene_type	description	0hr	3d	5d	7d	10d	14d	21d	28d	Rsquare	SLOPE
2139	EYA2	protein-coding	eyes absent homolog 2 (Drosophila)	8.97388	17.2894	21.7216	30.6243	33.2619	32.9896	29.8582	26.1146	1	1
84328	LZIC	protein-coding	leucine zipper and CTNNBIP1 domain containing	9.49606	17.6705	20.6961	27.3285	27.2033	28.8768	26.3355	21.9238	0.976624	0.74984
64223	MLST8	protein-coding	MTOR associated protein, LST8 homolog (S. cerevisiae)	32.491	36.5498	41.8371	51.7009	53.3191	56.2889	49.6101	48.616	0.961561	0.965918
10284	SAP18	protein-coding	Sin3A-associated protein, 18kDa	116.208	162.73	179.231	196.904	221.597	216.012	200.143	183.466	0.960813	3.84549
85865	GTPBP10	protein-coding	GTP-binding protein 10 (putative)	71.6147	107.43	115.288	141.13	147.929	155.306	129.603	128.06	0.960512	3.04801
4711	NDUFB5	protein-coding	NADH dehydrogenase (ubiquinone) 1 beta subcomplex, 5, 16kDa	111.192	140.694	144.22	178.632	191.406	184.698	186.242	175.418	0.959973	3.26986
8896	BUD31	protein-coding	BUD31 homolog (S. cerevisiae)	73.2767	96.0279	100.596	140.741	163.418	150.869	141.64	130.366	0.956415	3.55385
114805	GALNT13	protein-coding	UDP-N-acetyl-alpha-D-galactosamine:polypeptide N-acetylgalactosaminyltransferase 13 (GalNAc-T13)	26.8965	48.8634	60.6722	74.4719	80.9289	93.8305	82.6479	68.9561	0.952802	2.43022
10101	NUBP2	protein-coding	nucleotide binding protein 2 (MinD homolog, E. coli)	59.4381	98.386	121.623	131.69	150.764	153.728	144.905	122.076	0.951515	3.57357
8894	EIF2S2	protein-coding	eukaryotic translation initiation factor 2, subunit 2 beta, 38kDa	379.359	491.747	550.342	630.104	628.149	687.782	658.125	603.615	0.950662	11.5241
5683	PSMA2	protein-coding	proteasome (prosome, macropain) subunit, alpha type, 2	120.751	178.451	189.46	235.386	257.393	274.733	228.004	201.3	0.947463	5.56649
51614	ERGIC3	protein-coding	ERGIC and golgi 3	23.8763	37.3285	37.4425	48.605	46.7287	49.5931	45.0694	43.2006	0.944077	0.960153
1195	CLK1	protein-coding	CDC-like kinase 1	9.93374	13.4755	15.2272	16.58	18.2096	18.9586	18.8017	15.8025	0.936912	0.345029
84909	C9orf3	protein-coding	chromosome 9 open reading frame 3	9.45635	19.9841	32.6061	38.9059	46.8453	47.4056	40.6208	28.0736	0.935011	1.49986
8893	EIF2B5	protein-coding	eukaryotic translation initiation factor 2B, subunit 5 epsilon, 82kDa	3.25853	9.73798	14.1164	16.0514	16.4633	17.9745	16.2515	14.6654	0.931492	0.543744
51070	NOSIP	protein-coding	nitric oxide synthase interacting protein	20.9049	24.2567	31.1904	34.4777	37.7431	39.6073	32.7855	31.4716	0.927621	0.709831
3030	HADHA	protein-coding	hydroxyacyl-Coenzyme A dehydrogenase/3-ketoacyl-Coenzyme A thiolase/enoyl-Coenzyme A hydratase (trifunctional protein), alpha subunit	100.584	165.663	189.444	234.293	223.575	268.091	232.169	198.455	0.926587	5.77585
7515	XRCC1	protein-coding	X-ray repair complementing defective repair in Chinese hamster cells 1	0.681948	2.00122	2.13234	2.85646	3.30764	3.59178	3.27382	2.19755	0.924169	0.106699
817	CAMK2D	protein-coding	calcium/calmodulin-dependent protein kinase II delta	0.917784	2.24109	4.41774	6.3206	8.66188	7.23654	5.51437	5.97817	0.923131	0.286331
6868	ADAM17	protein-coding	ADAM metallopeptidase domain 17	23.5455	34.1267	35.8189	45.366	44.3103	41.3685	40.7707	38.8294	0.92222	0.782729
10243	GPHN	protein-coding	gephyrin	11.2269	14.2806	16.4199	16.8522	19.8081	19.9983	17.8946	17.5883	0.921682	0.323783
55017	C14orf119	protein-coding	chromosome 14 open reading frame 119	12.4954	24.7514	27.8336	33.4499	36.0752	32.828	30.6182	30.7798	0.921388	0.825047
5358	PLS3	protein-coding	plastin 3	97.7214	168.858	165.305	210.223	270.559	260.276	226.351	220.991	0.92136	6.33211
7266	DNAJC7	protein-coding	DnaJ (Hsp40) homolog, subfamily C, member 7	19.7138	24.5765	28.1608	31.7091	36.1676	38.0748	35.3643	28.3293	0.920501	0.701733
1540	CYLD	protein-coding	cylindromatosis (turban tumor syndrome)	2.09572	4.43703	4.7614	6.72232	7.50811	7.52592	5.4306	5.31222	0.9203	0.202323
51126	NAA20	protein-coding	N(alpha)-acetyltransferase 20, NatB catalytic subunit	109.603	164.305	160.423	191.642	213.498	214.147	182.104	174.556	0.916239	3.75483
100287163	LOC100287163	protein-coding	similar to Zinc finger protein 717	1.74665	7.11899	10.9297	14.9211	14.5608	12.6417	12.4238	10.7386	0.914961	0.484886
4735	SEPT2	protein-coding	septin 2	82.1385	110.967	131.656	143.588	169.598	157.379	136.459	128.582	0.914739	3.0229
100291317	LOC100291317	protein-coding	similar to dihydrofolate reductase	20.6289	30.2055	36.3	40.6086	51.4719	53.4732	48.1897	46.2667	0.912237	1.2608
56954	NIT2	protein-coding	nitrilase family, member 2	107.882	124.309	147.641	193.864	195.929	214.948	168.553	179.468	0.911005	4.14153
26269	FBXO8	protein-coding	F-box protein 8	5.01964	10.5773	11.5977	13.2793	18.26	17.6254	14.9368	14.8986	0.909747	0.474185
55486	PARL	protein-coding	presenilin associated, rhomboid-like	10.0555	16.808	16.3949	19.0205	21.0776	21.2088	21.0653	18.9007	0.909133	0.415919
27436	EML4	protein-coding	echinoderm microtubule associated protein like 4	15.7103	19.6019	25.4555	28.8472	37.9448	38.8746	33.8214	29.7703	0.909054	0.918472
55328	RNLS	protein-coding	renalase, FAD-dependent amine oxidase	11.0952	15.2326	14.6334	18.6669	23.0129	21.4477	20.6269	17.2827	0.907426	0.442108
55796	MBNL3	protein-coding	muscleblind-like 3 (Drosophila)	3.30617	9.21931	9.81375	13.0588	14.1984	11.8459	12.6066	11.5208	0.903516	0.376945
51318	MRPL35	protein-coding	mitochondrial ribosomal protein L35	60.1293	81.2653	107.01	109.594	124.48	116.114	121.514	110.943	0.903402	2.44197
27309	ZNF330	protein-coding	zinc finger protein 330	58.5675	86.019	86.9941	112.115	109.856	120.452	118.922	113.405	0.901051	2.39297
23609	MKRN2	protein-coding	makorin ring finger protein 2	3.82698	5.92723	6.26318	9.28051	9.28096	11.422	8.32487	7.78882	0.899646	0.262295
267	AMFR	protein-coding	autocrine motility factor receptor	3.34388	7.80121	10.62	10.8734	16.7509	15.5866	14.2946	11.7396	0.898548	0.482176
51808	PHAX	protein-coding	phosphorylated adaptor for RNA export	45.9036	51.8906	65.3467	72.0618	74.3153	84.3694	69.9366	70.2411	0.898358	1.36906
3422	IDI1	protein-coding	isopentenyl-diphosphate delta isomerase 1	24.4096	30.0049	33.9491	51.3045	65.0989	57.895	59.9268	45.9955	0.897315	1.66648
57222	ERGIC1	protein-coding	endoplasmic reticulum-golgi intermediate compartment (ERGIC) 1	18.1997	44.999	42.4823	54.6205	62.6585	63.5019	54.7267	57.6301	0.896589	1.635
348995	NUP43	protein-coding	nucleoporin 43kDa	40.5744	83.7547	117.894	126.267	145.54	174.258	149.185	111.153	0.896451	4.6014
51374	C2orf28	protein-coding	chromosome 2 open reading frame 28	2.41243	4.81974	7.51415	11.1202	13.9614	13.0892	8.20563	8.88798	0.896334	0.435455
6632	SNRPD1	protein-coding	small nuclear ribonucleoprotein D1 polypeptide 16kDa	394.244	434.607	478.547	600.992	701.659	697.558	593.232	530.974	0.895971	12.6559
9798	KIAA0174	protein-coding	KIAA0174	3.83619	10.0862	10.7202	13.6719	15.7445	12.9594	12.5797	11.8964	0.895362	0.389823
10363	HMG20A	protein-coding	high-mobility group 20A	5.04418	7.21694	11.0299	12.011	14.4515	11.9286	11.5792	10.973	0.894856	0.328441
6879	TAF7	protein-coding	TAF7 RNA polymerase II, TATA box binding protein (TBP)-associated factor, 55kDa	6.89402	11.9389	11.82	16.9192	19.9415	17.3236	15.074	12.6421	0.894727	0.451249
4521	NUDT1	protein-coding	nudix (nucleoside diphosphate linked moiety X)-type motif 1	10.3582	14.33	13.9218	28.4591	33.565	35.4445	29.0971	23.9053	0.894175	1.06054
22916	NCBP2	protein-coding	nuclear cap binding protein subunit 2, 20kDa	60.3933	109.972	131.561	177.519	212.398	186.905	142.091	133.88	0.893231	5.27355
11167	FSTL1	protein-coding	follistatin-like 1	73.4746	132.378	168.075	281.258	293.626	360.588	312.484	188.065	0.893056	11.0154
6687	SPG7	protein-coding	spastic paraplegia 7 (pure and complicated autosomal recessive)	10.976	22.5377	25.523	30.0586	35.569	34.5768	34.944	34.9315	0.891938	0.951764
7247	TSN	protein-coding	translin	45.7335	151.144	152.754	188.577	216.702	234.201	188.188	152.952	0.891523	6.34148
9943	OXSR1	protein-coding	oxidative-stress responsive 1	9.51935	18.9476	21.0743	25.0769	30.2673	25.6665	22.3958	22.1776	0.890619	0.666709
586	BCAT1	protein-coding	branched chain aminotransferase 1, cytosolic	9.52281	18.1131	25.6517	29.3445	45.469	44.9855	42.0412	32.5881	0.890479	1.43254
11044	PAPD7	protein-coding	PAP associated domain containing 7	6.48759	12.2823	12.1908	18.7218	18.5895	17.7546	14.6113	13.0007	0.889703	0.457263
49856	WDR8	protein-coding	WD repeat domain 8	0.435798	0.710488	1.25862	2.40186	2.64218	2.36801	1.63448	1.47825	0.889593	0.0890557
1723	DHODH	protein-coding	dihydroorotate dehydrogenase	1.86718	4.56613	4.49382	8.74716	8.4903	10.6538	7.36006	8.30887	0.887672	0.318008
81627	C1orf25	protein-coding	chromosome 1 open reading frame 25	16.7341	25.1043	28.2386	33.4295	38.9459	46.0738	38.5428	36.7275	0.887619	1.01697
5504	PPP1R2	protein-coding	protein phosphatase 1, regulatory (inhibitor) subunit 2	17.5348	37.6075	43.5236	56.1627	50.5312	53.1113	46.7204	43.6685	0.886785	1.3255
51426	POLK	protein-coding	polymerase (DNA directed) kappa	0.46729	1.52366	1.34958	3.09051	2.83311	2.87139	2.10311	1.98135	0.886668	0.0985494
22929	SEPHS1	protein-coding	selenophosphate synthetase 1	72.7888	107.908	132.812	130.988	162.115	159.448	136.697	138.489	0.886506	3.15415
56061	UBFD1	protein-coding	ubiquitin family domain containing 1	9.21792	10.9206	12.8576	16.2319	18.9957	15.1743	16.0526	14.2761	0.886504	0.34419
10539	GLRX3	protein-coding	glutaredoxin 3	37.8118	51.0459	52.3201	63.2376	62.5365	67.0816	70.5101	61.6321	0.886076	1.16362
79711	IPO4	protein-coding	importin 4	3.43755	8.8723	10.8284	10.8891	14.7626	14.082	11.8698	11.5389	0.885613	0.384576
10296	MAEA	protein-coding	macrophage erythroblast attacher	5.75943	11.8392	12.4536	13.9695	18.2184	19.1789	18.5054	15.077	0.884809	0.490046
3416	IDE	protein-coding	insulin-degrading enzyme	6.44634	23.194	28.3665	34.9159	39.4667	37.6414	27.4393	27.7842	0.884738	1.14224
63931	MRPS14	protein-coding	mitochondrial ribosomal protein S14	18.3438	34.9195	46.5667	45.7274	56.6906	54.9915	46.5211	43.2883	0.884081	1.33287
4905	NSF	protein-coding	N-ethylmaleimide-sensitive factor	7.27748	12.8444	17.3943	20.3897	21.2345	26.746	18.9439	17.204	0.883105	0.635324
163	AP2B1	protein-coding	adaptor-related protein complex 2, beta 1 subunit	8.26389	17.4082	25.2317	26.2207	28.7082	28.8313	25.2486	20.8213	0.882692	0.761682
130132	RFTN2	protein-coding	raftlin family member 2	2.2718	4.93834	6.07517	8.90371	12.1973	10.8664	7.95055	6.12849	0.881529	0.354089
5682	PSMA1	protein-coding	proteasome (prosome, macropain) subunit, alpha type, 1	170.384	248.619	254.951	298.65	309.381	351.783	287.684	257.279	0.88048	5.85884
7174	TPP2	protein-coding	tripeptidyl peptidase II	17.0023	32.4613	36.8004	38.3854	46.8961	48.0125	38.1679	39.3447	0.878361	1.05107
10162	LPCAT3	protein-coding	lysophosphatidylcholine acyltransferase 3	0	2.05209	3.18883	3.65119	5.02063	3.63462	3.72697	2.80896	0.877882	0.161983
9139	CBFA2T2	protein-coding	core-binding factor, runt domain, alpha subunit 2; translocated to, 2	15.4213	17.7486	26.3147	34.1055	33.647	40.7998	33.0856	25.025	0.875414	0.951627
54442	KCTD5	protein-coding	potassium channel tetramerisation domain containing 5	40.5171	73.7765	79.3963	90.8925	104.656	119.079	95.7769	103.12	0.875389	2.62905
5000	ORC4L	protein-coding	origin recognition complex, subunit 4-like (yeast)	6.21344	8.24415	16.1045	22.1274	24.9788	23.743	23.6622	12.8809	0.875122	0.813777
51056	LAP3	protein-coding	leucine aminopeptidase 3	14.7768	31.756	42.6033	43.4647	52.9119	47.1882	44.3366	36.4194	0.874875	1.28145
202	AIM1	protein-coding	absent in melanoma 1	4.36879	9.85267	9.28923	12.0785	11.8287	12.591	12.7673	10.4605	0.874515	0.300342
115024	NT5C3L	protein-coding	5'-nucleotidase, cytosolic III-like	22.5416	37.6999	41.003	53.7682	53.704	69.6493	50.7335	48.1814	0.874432	1.50736
989	43350	protein-coding	septin 7	49.5051	67.624	79.8877	88.7217	82.846	87.2615	89.3781	83.2904	0.872876	1.48494
5527	PPP2R5C	protein-coding	protein phosphatase 2, regulatory subunit B', gamma isoform	38.2803	57.9537	56.2155	70.3652	71.5273	65.3692	63.1516	63.8029	0.87223	1.14749
23411	SIRT1	protein-coding	sirtuin (silent mating type information regulation 2 homolog) 1 (S. cerevisiae)	5.29783	5.69266	10.6618	11.9449	13.87	12.1316	12.4655	11.8892	0.871851	0.349189
23248	RPRD2	protein-coding	regulation of nuclear pre-mRNA domain containing 2	0.769126	2.14957	2.00975	2.78561	3.00103	3.76158	2.80222	2.3294	0.87178	0.0954231
9039	UBA3	protein-coding	ubiquitin-like modifier activating enzyme 3	31.1382	57.6041	67.0573	71.1895	76.2282	88.9946	70.6299	66.6946	0.871446	1.82434
93323	HAUS8	protein-coding	HAUS augmin-like complex, subunit 8	6.93145	14.2811	17.5305	20.8486	22.0848	20.8073	16.5166	18.8136	0.871269	0.531779
26019	UPF2	protein-coding	UPF2 regulator of nonsense transcripts homolog (yeast)	2.41605	4.65414	7.01571	8.40999	9.63691	7.97331	7.78237	5.47796	0.870302	0.254831
9861	PSMD6	protein-coding	proteasome (prosome, macropain) 26S subunit, non-ATPase, 6	450.619	515.603	579.777	769.256	777.597	846.563	678.704	587.867	0.870109	15.1822
55239	OGFOD1	protein-coding	2-oxoglutarate and iron-dependent oxygenase domain containing 1	7.8545	13.4326	14.9061	15.7526	19.9947	16.8922	16.9042	14.9156	0.869935	0.381387
7443	VRK1	protein-coding	vaccinia related kinase 1	27.2474	43.6579	58.0282	66.5425	76.5655	92.1182	69.6333	53.0845	0.869934	2.18423
8452	CUL3	protein-coding	cullin 3	115.701	158.344	162.183	177.949	200.649	201.299	183.647	197.671	0.86963	3.15592
57102	C12orf4	protein-coding	chromosome 12 open reading frame 4	16.3616	24.3782	24.523	29.7177	28.8351	29.2699	27.8295	23.5452	0.869624	0.482601
7155	TOP2B	protein-coding	topoisomerase (DNA) II beta 180kDa	7.09135	16.6657	21.1425	31.816	35.0866	43.8118	28.8375	20.3597	0.86833	1.25864
10762	NUP50	protein-coding	nucleoporin 50kDa	30.284	40.8594	49.2253	63.224	52.6626	59.487	56.1303	53.2828	0.866692	1.15236
57508	INTS2	protein-coding	integrator complex subunit 2	0.153213	1.00164	1.85699	2.68863	2.78671	3.12294	1.63769	1.81897	0.865856	0.107161
5702	PSMC3	protein-coding	proteasome (prosome, macropain) 26S subunit, ATPase, 3	43.5422	84.0202	94.6278	105.478	126.178	149.175	124.46	124.772	0.865733	3.54321
80071	CCDC15	protein-coding	coiled-coil domain containing 15	6.42029	12.0116	13.5207	18.7679	29.7489	23.3884	20.3848	17.6074	0.864783	0.780273
10944	C11orf58	protein-coding	chromosome 11 open reading frame 58	72.0576	92.3405	106.678	147.762	176.296	187.022	143.79	109.43	0.864719	4.41873
54205	CYCS	protein-coding	cytochrome c, somatic	311.277	466.897	432.656	636.825	665.289	668.966	621.542	444.509	0.863274	14.5259
58491	ZNF71	protein-coding	zinc finger protein 71	2.97222	3.84903	4.83791	5.62767	7.66814	7.97898	6.01486	5.25549	0.863133	0.186327
22872	SEC31A	protein-coding	SEC31 homolog A (S. cerevisiae)	18.911	20.8315	23.7249	24.0436	26.105	26.7657	23.2756	23.3982	0.863085	0.277289
55684	C9orf86	protein-coding	chromosome 9 open reading frame 86	22.4873	24.3648	28.4643	30.5526	31.1718	35.5123	30.0666	28.9301	0.860635	0.437861
9061	PAPSS1	protein-coding	3'-phosphoadenosine 5'-phosphosulfate synthase 1	17.3993	20.3898	23.619	29.2642	28.0592	33.1825	26.066	28.361	0.86044	0.552414
51371	POMP	protein-coding	proteasome maturation protein	106.937	170.724	182.701	240.581	208.181	255.356	206.988	191.017	0.860082	4.92673
4731	NDUFV3	protein-coding	NADH dehydrogenase (ubiquinone) flavoprotein 3, 10kDa	79.9981	85.7898	89.3369	102.824	106.174	109.587	113.948	102.728	0.859971	1.31977
26054	SENP6	protein-coding	SUMO1/sentrin specific peptidase 6	10.5415	16.3834	17.6128	22.5815	23.4154	28.758	20.0157	21.4647	0.859467	0.585104
8815	BANF1	protein-coding	barrier to autointegration factor 1	107.183	158.915	161.908	223.401	227.692	291.426	253.166	197.526	0.858732	6.34957
1611	DAP	protein-coding	death-associated protein	100.107	135.247	140.49	197.445	191.973	165.406	170.12	150.593	0.857354	3.44175
1434	CSE1L	protein-coding	CSE1 chromosome segregation 1-like (yeast)	26.0156	62.0932	79.934	98.9495	101.916	135.251	92.5051	73.8402	0.85612	3.45909
34	ACADM	protein-coding	acyl-Coenzyme A dehydrogenase, C-4 to C-12 straight chain	48.7286	71.7975	71.395	77.6469	87.1261	97.3057	90.0598	82.5182	0.855758	1.60924
5436	POLR2G	protein-coding	polymerase (RNA) II (DNA directed) polypeptide G	55.8966	90.6988	102.762	122.598	175.076	186.756	149.773	111.751	0.854844	4.74187
23517	SKIV2L2	protein-coding	superkiller viralicidic activity 2-like 2 (S. cerevisiae)	11.6568	27.5604	32.2993	35.5591	41.2261	46.4765	33.2266	29.4577	0.854074	1.11373
9815	GIT2	protein-coding	G protein-coupled receptor kinase interacting ArfGAP 2	2.73173	5.01446	4.17615	6.27844	6.21596	6.59994	5.32183	5.4098	0.85393	0.137334
27042	C1orf107	protein-coding	chromosome 1 open reading frame 107	9.14352	21.0898	25.095	31.7663	37.7971	36.4325	23.6685	25.3057	0.853389	0.99294
55607	PPP1R9A	protein-coding	protein phosphatase 1, regulatory (inhibitor) subunit 9A	2.51426	3.82828	3.99219	6.19161	6.29287	5.32849	4.63842	5.17759	0.853015	0.137409
1642	DDB1	protein-coding	damage-specific DNA binding protein 1, 127kDa	15.0285	16.8918	27.3305	27.487	38.1701	39.256	32.2602	27.9472	0.852361	0.945448
1365	CLDN3	protein-coding	claudin 3	3.45783	5.14878	6.10287	6.3525	6.98809	7.90711	6.05206	5.86458	0.85209	0.140567
7341	SUMO1	protein-coding	SMT3 suppressor of mif two 3 homolog 1 (S. cerevisiae)	27.609	33.6736	31.1153	41.4119	48.9719	47.5909	40.0784	38.4163	0.852072	0.812726
25921	ZDHHC5	protein-coding	zinc finger, DHHC-type containing 5	0.986473	7.23718	8.30728	10.6046	11.2141	11.6903	9.2495	6.48322	0.851992	0.372742
54801	HAUS6	protein-coding	HAUS augmin-like complex, subunit 6	1.61588	6.75062	10.8892	11.3526	13.4767	12.0373	12.8783	7.87573	0.851736	0.428799
7874	USP7	protein-coding	ubiquitin specific peptidase 7 (herpes virus-associated)	12.8601	22.4964	23.5723	26.1006	29.3446	31.8351	24.3352	23.6898	0.851703	0.603556
85461	TANC1	protein-coding	tetratricopeptide repeat, ankyrin repeat and coiled-coil containing 1	0.733173	1.48965	1.76456	3.23265	3.88947	2.57438	3.16226	2.95327	0.850283	0.11339
222229	LRWD1	protein-coding	leucine-rich repeats and WD repeat domain containing 1	4.49267	11.1317	13.4961	15.3208	20.0315	22.6044	16.0074	11.928	0.850232	0.599916
9871	SEC24D	protein-coding	SEC24 family, member D (S. cerevisiae)	1.18204	3.31187	5.03949	4.83951	5.63086	5.78105	6.22941	5.02055	0.849711	0.176381
4720	NDUFS2	protein-coding	NADH dehydrogenase (ubiquinone) Fe-S protein 2, 49kDa (NADH-coenzyme Q reductase)	91.985	127.912	133.189	143.557	174.56	190.324	176.608	164.02	0.848895	3.46969
8451	CUL4A	protein-coding	cullin 4A	3.28149	6.95483	12.0045	10.8514	17.9057	15.5551	13.2919	12.2441	0.84884	0.497171
23091	ZC3H13	protein-coding	zinc finger CCCH-type containing 13	5.71539	13.0989	16.2333	20.911	26.3394	24.4353	16.2514	14.8298	0.848581	0.709496
5717	PSMD11	protein-coding	proteasome (prosome, macropain) 26S subunit, non-ATPase, 11	18.4436	56.2036	77.7686	79.9561	82.3546	95.0716	75.0478	70.3937	0.84813	2.50426
4867	NPHP1	protein-coding	nephronophthisis 1 (juvenile)	1.56763	7.98666	7.16848	9.07184	13.0684	12.8562	9.18076	8.97328	0.847173	0.385681
10072	DPP3	protein-coding	dipeptidyl-peptidase 3	12.5752	31.4932	35.347	39.3556	42.2506	47.5206	35.7756	39.9957	0.846878	1.12237
8148	TAF15	protein-coding	TAF15 RNA polymerase II, TATA box binding protein (TBP)-associated factor, 68kDa	393.28	422.478	528.358	622.867	801.313	869.07	747.057	614.048	0.846651	18.5591
80349	WDR61	protein-coding	WD repeat domain 61	29.5841	48.6321	53.7017	58.2754	57.8752	69.0942	59.6251	51.0351	0.845524	1.23133
256714	MAP7D2	protein-coding	MAP7 domain containing 2	1.60259	5.82043	7.22523	8.76912	13.2276	8.90212	10.4158	9.424	0.84541	0.36812
51053	GMNN	protein-coding	geminin, DNA replication inhibitor	43.1516	78.8254	87.1725	94.6711	107.47	127.547	94.0978	100.053	0.845281	2.61208
10204	NUTF2	protein-coding	nuclear transport factor 2	317.575	520.569	620.489	656.397	721.997	780.492	608.474	543.002	0.845178	15.1682
23256	SCFD1	protein-coding	sec1 family domain containing 1	24.9929	38.1822	36.403	41.2722	48.2208	50.5947	47.266	47.1895	0.845117	0.907581
115908	CTHRC1	protein-coding	collagen triple helix repeat containing 1	46.529	58.0451	90.2363	168.867	175.883	146.68	126.076	91.2881	0.844933	5.24875
3550	IK	protein-coding	IK cytokine, down-regulator of HLA II	35.1795	49.2705	53.9694	77.2761	66.8692	83.3049	69.0394	53.9774	0.844932	1.70055
1456	CSNK1G3	protein-coding	casein kinase 1, gamma 3	1.3341	4.35002	4.88048	6.76456	5.66192	7.02663	5.37387	5.88297	0.844213	0.190887
1173	AP2M1	protein-coding	adaptor-related protein complex 2, mu 1 subunit	123.987	150.375	162.571	180.694	173.236	194.91	166.892	156.699	0.844166	2.27797
6120	RPE	protein-coding	ribulose-5-phosphate-3-epimerase	198.74	223.458	258.936	255.247	264.927	287.771	272.65	262.802	0.843677	3.05172
9391	CIAO1	protein-coding	cytosolic iron-sulfur protein assembly 1 homolog (S. cerevisiae)	32.7717	30.9666	36.8713	53.3561	55.462	62.2895	50.5343	46.7545	0.842854	1.22265
26003	GORASP2	protein-coding	golgi reassembly stacking protein 2, 55kDa	80.2337	93.8985	90.7069	128.589	115.32	124.106	121.762	116.417	0.842788	1.92208
78988	MRP63	protein-coding	mitochondrial ribosomal protein 63	33.8193	63.3728	74.9308	86.8132	107.419	94.5102	75.7921	65.1737	0.842429	2.39121
10175	CNIH	protein-coding	cornichon homolog (Drosophila)	238.701	317.785	313.227	384.397	404.556	449.845	349.151	328.844	0.842039	6.92168
26046	RNF160	protein-coding	ring finger protein 160	1.23865	3.02908	4.66137	5.08899	7.85108	7.21581	4.56113	4.87096	0.841792	0.225451
54881	TEX10	protein-coding	testis expressed 10	8.29661	13.1879	16.9766	18.9603	18.8566	21.1133	15.6004	15.3025	0.841169	0.427316
10238	DCAF7	protein-coding	DDB1 and CUL4 associated factor 7	11.7964	18.6921	25.0768	27.3245	33.4616	36.5378	26.2146	21.1903	0.840604	0.847252
221078	NSUN6	protein-coding	NOP2/Sun domain family, member 6	3.49678	6.76977	9.25744	11.4718	11.9252	13.1799	9.8361	12.9733	0.840196	0.356502
10073	SNUPN	protein-coding	snurportin 1	6.23085	10.1583	16.7099	16.1892	24.285	23.0504	16.6955	18.3652	0.839321	0.641589
10055	SAE1	protein-coding	SUMO1 activating enzyme subunit 1	14.6227	24.0686	32.1358	33.7888	43.1498	51.7161	48.48	38.1633	0.839236	1.32429
16	AARS	protein-coding	alanyl-tRNA synthetase	68.4508	153.982	162.964	173.501	273.027	276.968	217.641	209.845	0.838455	7.28782
54677	CROT	protein-coding	carnitine O-octanoyltransferase	9.86968	15.0321	15.2524	21.1858	20.471	25.9846	20.2598	22.2434	0.838175	0.541914
546	ATRX	protein-coding	alpha thalassemia/mental retardation syndrome X-linked (RAD54 homolog, S. cerevisiae)	13.2623	18.9372	24.0781	31.1331	33.321	31.2513	25.0432	20.033	0.838171	0.74885
9821	RB1CC1	protein-coding	RB1-inducible coiled-coil 1	4.26172	7.95062	7.94578	9.81574	9.0066	10.4647	9.16858	7.82464	0.837283	0.201576
221120	ALKBH3	protein-coding	alkB, alkylation repair homolog 3 (E. coli)	4.51574	5.98169	8.69458	10.5774	11.978	13.884	14.8194	10.5309	0.836217	0.383454
10059	DNM1L	protein-coding	dynamin 1-like	32.3225	51.7242	59.8771	56.666	66.7714	68.1346	62.9469	60.8101	0.835965	1.21691
892	CCNC	protein-coding	cyclin C	34.1192	52.4265	69.9693	69.737	78.4223	90.3463	80.9627	82.6704	0.83589	1.95689
84717	HDGF2	protein-coding	hepatoma-derived growth factor-related protein 2	9.60762	16.7064	23.4653	29.2267	32.1472	43.6853	28.1311	24.0221	0.835856	1.08853
25793	FBXO7	protein-coding	F-box protein 7	5.11303	10.4198	11.9541	16.1028	13.2633	16.3503	15.8892	11.1495	0.83573	0.404408
10985	GCN1L1	protein-coding	GCN1 general control of amino-acid synthesis 1-like 1 (yeast)	17.882	21.1859	25.09	27.5302	26.6595	32.23	26.0698	25.3664	0.835635	0.454472
123811	C16orf63	protein-coding	chromosome 16 open reading frame 63	1.86322	3.47159	6.14989	7.92178	10.4895	9.28307	6.58876	4.59341	0.835604	0.311294
8089	YEATS4	protein-coding	YEATS domain containing 4	6.86125	14.7749	15.3166	21.0607	28.2245	27.8473	17.6632	16.7599	0.834915	0.754676
80821	DDHD1	protein-coding	DDHD domain containing 1	4.12157	9.09227	8.67962	13.3455	12.4942	12.5409	10.0478	8.68328	0.834662	0.318373
8841	HDAC3	protein-coding	histone deacetylase 3	1.0993	5.37662	4.76232	6.0587	9.99733	8.20242	7.00904	6.05946	0.833767	0.277904
9949	AMMECR1	protein-coding	Alport syndrome, mental retardation, midface hypoplasia and elliptocytosis chromosomal region gene 1	15.76	22.9254	21.4178	31.2358	33.385	33.1959	27.5842	21.5699	0.833483	0.685998
5707	PSMD1	protein-coding	proteasome (prosome, macropain) 26S subunit, non-ATPase, 1	50.4272	119.316	127.207	133.57	168.956	158.569	130.372	126.061	0.833283	3.75744
9924	PAN2	protein-coding	PAN2 poly(A) specific ribonuclease subunit homolog (S. cerevisiae)	2.07611	2.93116	5.32045	5.4923	8.81099	8.74779	6.85214	4.83102	0.832287	0.260398
200373	hCG_17324	protein-coding	primary ciliary dyskinesia protein 1	0	0	0.30742	1.05598	0.96803	1.12127	0.958133	1.08319	0.831915	0.0527181
10857	PGRMC1	protein-coding	progesterone receptor membrane component 1	65.4153	100.039	97.2675	109.047	117.7	116.543	100.294	104.696	0.831801	1.74139
7511	XPNPEP1	protein-coding	X-prolyl aminopeptidase (aminopeptidase P) 1, soluble	30.5067	47.9228	50.7471	55.3048	58.1409	62.5832	55.7383	44.8227	0.831501	1.05739
254531	LPCAT4	protein-coding	lysophosphatidylcholine acyltransferase 4	2.73118	6.67903	6.13504	7.52633	9.65926	7.99963	7.51182	7.72028	0.831245	0.213248
29074	MRPL18	protein-coding	mitochondrial ribosomal protein L18	70.7235	97.2415	118.408	128.359	179.985	166.599	125.382	123.453	0.831179	3.70518
10765	KDM5B	protein-coding	lysine (K)-specific demethylase 5B	15.2868	21.1585	20.7098	36.2687	37.8197	42.0011	27.2453	27.8038	0.830664	1.00008
8801	SUCLG2	protein-coding	succinate-CoA ligase, GDP-forming, beta subunit	65.1144	95.7104	108.603	106.867	135.554	143.58	124.749	129.204	0.829841	2.68833
81490	PTDSS2	protein-coding	phosphatidylserine synthase 2	12.4289	17.9825	21.9459	22.6478	25.3681	27.3937	22.3496	18.3332	0.829582	0.499501
10970	CKAP4	protein-coding	cytoskeleton-associated protein 4	27.7426	41.6109	53.4128	66.784	57.255	56.0048	59.0752	51.5247	0.828754	1.27425
55737	VPS35	protein-coding	vacuolar protein sorting 35 homolog (S. cerevisiae)	74.641	87.7521	94.5133	115.547	107.215	104.813	96.7742	102.705	0.828395	1.34495
55839	CENPN	protein-coding	centromere protein N	2.49988	4.38468	7.21564	10.8538	9.80131	14.6851	8.70343	8.35388	0.828264	0.400545
285346	ZNF852	protein-coding	zinc finger protein 852	0.674838	1.95963	2.60242	3.82927	4.50651	4.67214	2.34319	3.20639	0.828097	0.143776
210	ALAD	protein-coding	aminolevulinate, delta-, dehydratase	1.81238	6.67043	8.82634	11.2584	10.682	11.2972	7.67778	9.71226	0.827735	0.336489
2224	FDPS	protein-coding	farnesyl diphosphate synthase (farnesyl pyrophosphate synthetase, dimethylallyltranstransferase, geranyltranstransferase)	7.48012	16.5076	29.9263	34.8058	45.2185	60.306	35.4445	31.1133	0.827212	1.71788
572	BAD	protein-coding	BCL2-associated agonist of cell death	0.710372	4.05346	4.78711	5.48121	8.61375	10.6009	6.92711	5.42166	0.827202	0.316571
4089	SMAD4	protein-coding	SMAD family member 4	1.14164	6.83225	7.86737	9.2283	12.6895	10.9001	7.42169	8.96484	0.826791	0.361444
493856	CISD2	protein-coding	CDGSH iron sulfur domain 2	10.6653	11.2368	12.5969	20.3528	19.5333	21.4921	22.7519	16.9995	0.826528	0.512206
55832	CAND1	protein-coding	cullin-associated and neddylation-dissociated 1	30.3458	60.1546	60.1263	68.1978	73.7038	86.1325	67.7033	58.8103	0.826033	1.69775
221150	SKA3	protein-coding	spindle and kinetochore associated complex subunit 3	3.59689	2.93204	6.05976	9.41638	8.17778	8.68294	7.41965	6.48172	0.825949	0.247424
3376	IARS	protein-coding	isoleucyl-tRNA synthetase	18.8972	49.6842	56.3885	59.3964	78.4135	73.4901	55.6685	51.4135	0.825881	1.90064
23380	SRGAP2	protein-coding	SLIT-ROBO Rho GTPase activating protein 2	0	0	1.91981	3.29725	6.04525	4.37638	2.99172	2.53666	0.825758	0.217873
29097	CNIH4	protein-coding	cornichon homolog 4 (Drosophila)	82.4241	120.295	142.968	152.129	190.536	164.541	145.95	125.204	0.825591	3.41158
285672	SFRS12IP1	protein-coding	SFRS12-interacting protein 1	24.3516	27.7162	27.0485	39.5187	45.4007	38.0216	36.0784	33.2743	0.825143	0.76152
10274	STAG1	protein-coding	stromal antigen 1	5.93383	11.1551	15.7105	18.5209	18.6627	25.4957	18.3643	13.2825	0.824052	0.621158
9318	COPS2	protein-coding	COP9 constitutive photomorphogenic homolog subunit 2 (Arabidopsis)	60.0755	76.005	70.7759	84.967	88.8663	98.169	95.2542	89.3738	0.823808	1.37495
51773	RSF1	protein-coding	remodeling and spacing factor 1	4.33802	6.35514	8.27454	12.3251	10.7643	9.71831	8.87853	8.36032	0.823588	0.26286
151903	CCDC12	protein-coding	coiled-coil domain containing 12	13.0041	30.8126	33.8334	38.769	40.3377	46.0886	33.7164	30.5698	0.822801	1.03328
58493	C9orf80	protein-coding	chromosome 9 open reading frame 80	10.7336	16.8037	27.0881	26.1736	29.0589	26.6337	27.3666	22.0005	0.82278	0.674663
64965	MRPS9	protein-coding	mitochondrial ribosomal protein S9	9.01646	19.5253	24.1963	23.6699	29.4113	29.2218	22.3308	21.9347	0.822191	0.677895
7637	ZNF84	protein-coding	zinc finger protein 84	4.80592	9.76044	11.6689	15.3913	13.8667	19.0484	12.7944	11.2724	0.821967	0.440785
54708	43164	protein-coding	membrane-associated ring finger (C3HC4) 5	12.8621	17.6525	18.9574	20.2533	20.6457	20.8508	19.2729	21.1227	0.821587	0.287204
10535	RNASEH2A	protein-coding	ribonuclease H2, subunit A	12.6669	37.2158	41.5303	43.1082	56.5923	63.0394	44.3587	38.9256	0.821012	1.57374
55699	IARS2	protein-coding	isoleucyl-tRNA synthetase 2, mitochondrial	6.04427	17.222	19.156	18.233	26.7206	27.3646	25.9922	19.2553	0.820975	0.73819
4677	NARS	protein-coding	asparaginyl-tRNA synthetase	77.7985	176.903	146.937	213.814	257.148	264.96	234.251	261.81	0.820968	7.00476
11328	FKBP9	protein-coding	FK506 binding protein 9, 63 kDa	14.9496	20.6333	19.5933	26.5201	33.9002	35.7153	36.1845	27.7938	0.820714	0.845777
5708	PSMD2	protein-coding	proteasome (prosome, macropain) 26S subunit, non-ATPase, 2	37.3481	88.1736	111.967	141.37	134.719	149.3	109.835	86.1054	0.820669	3.87103
7391	USF1	protein-coding	upstream transcription factor 1	5.19007	12.3767	12.1706	16.3163	18.1936	20.447	13.8429	11.4055	0.820118	0.495511
29915	HCFC2	protein-coding	host cell factor C2	1.85565	4.82098	4.28249	8.15669	9.88733	9.29889	6.07584	4.7281	0.820087	0.29209
51501	C11orf73	protein-coding	chromosome 11 open reading frame 73	8.92999	15.7217	14.7672	25.5968	23.3528	25.835	18.2601	23.2253	0.820043	0.638077
51608	C7orf20	protein-coding	chromosome 7 open reading frame 20	13.5597	33.9493	33.5437	34.7294	42.5731	46.3578	40.9136	36.5498	0.81984	1.04458
100289635	ZNF605	protein-coding	zinc finger protein 605	3.82211	6.61502	6.47171	8.82217	9.98645	12.104	7.76007	7.80369	0.819741	0.262161
10521	DDX17	protein-coding	DEAD (Asp-Glu-Ala-Asp) box polypeptide 17	9.03182	6.17282	17.4323	20.4811	23.8618	27.7448	22.3271	20.4905	0.81974	0.776787
10425	ARIH2	protein-coding	ariadne homolog 2 (Drosophila)	11.5925	20.9807	20.1719	24.3287	25.1974	28.7576	22.0526	24.9861	0.819079	0.538323
8563	THOC5	protein-coding	THO complex 5	9.61583	20.3217	19.7952	28.5613	27.4941	27.3939	21.4366	19.1578	0.819004	0.656337
22981	NINL	protein-coding	ninein-like	10.4361	18.5397	19.0586	21.037	29.2489	24.256	22.7176	18.6638	0.818691	0.572564
55171	TBCCD1	protein-coding	TBCC domain containing 1	2.63306	6.00979	7.96445	12.1783	12.771	14.7927	9.08534	6.25204	0.818281	0.429053
10171	RCL1	protein-coding	RNA terminal phosphate cyclase-like 1	24.8117	33.2691	33.9964	37.6432	47.6285	46.896	37.1622	35.3025	0.817964	0.782242
8723	SNX4	protein-coding	sorting nexin 4	11.0142	23.9187	28.2588	33.0156	36.7895	42.9142	29.1095	23.5785	0.817918	1.01413
3189	HNRNPH3	protein-coding	heterogeneous nuclear ribonucleoprotein H3 (2H9)	1674.98	1705.41	1963.66	2848.44	2786.6	3327.44	2763.88	2176.28	0.8174	64.1007
10438	C1D	protein-coding	C1D nuclear receptor co-repressor	33.7657	46.0435	54.3019	66.7082	63.7597	83.5746	79.6224	68.2555	0.817245	1.75886
10213	PSMD14	protein-coding	proteasome (prosome, macropain) 26S subunit, non-ATPase, 14	75.2477	104.926	118.046	137.075	141.729	188.126	154.697	128.703	0.817214	3.54736
7175	TPR	protein-coding	translocated promoter region (to activated MET oncogene)	2.87036	7.02012	8.99755	10.2972	13.4333	15.3247	9.68615	7.56296	0.816828	0.406118
8427	ZNF282	protein-coding	zinc finger protein 282	1.15118	1.87476	2.20952	2.98335	3.75293	2.77974	2.49933	2.13757	0.81655	0.0821526
5048	PAFAH1B1	protein-coding	platelet-activating factor acetylhydrolase, isoform Ib, subunit 1 (45kDa)	60.2992	74.1423	75.8795	85.2649	89.3679	103.458	81.9434	81.2221	0.816334	1.31601
54935	DUSP23	protein-coding	dual specificity phosphatase 23	13.4448	19.8208	26.3297	30.5704	40.0015	33.5171	27.6367	21.8672	0.815938	0.876828
128308	MRPL55	protein-coding	mitochondrial ribosomal protein L55	50.4971	55.3426	66.0559	65.2146	74.7744	78.8276	78.6355	71.4208	0.815765	1.10006
754	PTTG1IP	protein-coding	pituitary tumor-transforming 1 interacting protein	22.1339	51.0116	52.3013	52.9813	66.03	67.7131	59.226	60.4719	0.814888	1.50361
23379	KIAA0947	protein-coding	KIAA0947	1.65478	3.06938	4.05504	3.97971	5.9284	6.3941	4.40084	3.9547	0.814832	0.157652
131118	DNAJC19	protein-coding	DnaJ (Hsp40) homolog, subfamily C, member 19	19.0607	20.7806	26.7437	28.7301	39.9807	33.9941	30.2097	30.6705	0.814688	0.712088
5781	PTPN11	protein-coding	protein tyrosine phosphatase, non-receptor type 11	8.08522	11.1186	12.2025	12.8476	15.7842	13.0643	14.8059	13.7608	0.814475	0.249087
1894	ECT2	protein-coding	epithelial cell transforming sequence 2 oncogene	0.324097	5.79075	9.0988	8.58597	13.2368	15.3745	9.36291	7.46894	0.814049	0.479925
8241	RBM10	protein-coding	RNA binding motif protein 10	0	2.267	1.99469	3.80651	4.88526	6.51546	3.11359	3.46924	0.814041	0.205784
23118	TAB2	protein-coding	TGF-beta activated kinase 1/MAP3K7 binding protein 2	8.08186	9.1748	11.52	17.2955	14.697	16.5683	13.5605	11.2764	0.813947	0.350804
10730	YME1L1	protein-coding	YME1-like 1 (S. cerevisiae)	11.8045	29.8108	30.7877	36.6191	35.6112	41.7887	41.8208	39.3445	0.813563	1.03434
55667	DENND4C	protein-coding	DENN/MADD domain containing 4C	0.413465	3.87595	4.17944	4.78543	6.89363	5.08129	4.65215	4.55813	0.813493	0.19077
26128	KIAA1279	protein-coding	KIAA1279	17.4441	22.1776	23.6365	27.1623	30.0064	34.841	31.3197	31.8658	0.813332	0.612788
5571	PRKAG1	protein-coding	protein kinase, AMP-activated, gamma 1 non-catalytic subunit	7.52243	15.6086	17.117	26.6168	26.9498	24.0122	16.9279	17.9776	0.81257	0.685803
4722	NDUFS3	protein-coding	NADH dehydrogenase (ubiquinone) Fe-S protein 3, 30kDa (NADH-coenzyme Q reductase)	172.843	217.349	232.965	238.016	272.774	268.938	227.796	223.969	0.811848	3.28686
91304	C19orf6	protein-coding	chromosome 19 open reading frame 6	0.596366	1.4584	2.67922	3.06769	3.61567	2.44301	2.83314	2.69721	0.811686	0.100498
83988	NCALD	protein-coding	neurocalcin delta	0.776891	6.33289	5.95337	10.2334	18.8407	12.6438	10.4895	9.53306	0.811637	0.557161
10728	PTGES3	protein-coding	prostaglandin E synthase 3 (cytosolic)	123.539	182.231	178.277	228.571	216.23	236.855	202.81	167.333	0.810975	3.89268
57472	CNOT6	protein-coding	CCR4-NOT transcription complex, subunit 6	12.5069	19.0946	23.1044	21.9446	27.5572	27.8038	21.8198	22.1236	0.81093	0.508531
10987	COPS5	protein-coding	COP9 constitutive photomorphogenic homolog subunit 5 (Arabidopsis)	126.951	143.296	165.657	168.729	165.693	188.297	169.166	156.621	0.81027	1.94446
5695	PSMB7	protein-coding	proteasome (prosome, macropain) subunit, beta type, 7	204.114	386.135	414.567	497.068	455.019	472.503	450.962	479.617	0.810239	9.88877
54407	SLC38A2	protein-coding	solute carrier family 38, member 2	30.6478	60.0323	64.3384	95.2727	102.136	107.417	65.0705	64.8436	0.810229	2.71546
51367	POP5	protein-coding	processing of precursor 5, ribonuclease P/MRP subunit (S. cerevisiae)	30.7741	40.4834	42.4587	61.4594	68.5531	88.8453	77.7473	63.9985	0.810189	2.0891
5692	PSMB4	protein-coding	proteasome (prosome, macropain) subunit, beta type, 4	733.44	1308.91	1299.99	1687.58	1611.3	1601.41	1436.81	1182.75	0.80955	32.3106
6760	SS18	protein-coding	synovial sarcoma translocation, chromosome 18	22.5757	32.3667	37.7319	43.2634	51.2792	51.8352	38.6239	32.3733	0.809063	1.04261
55133	SRBD1	protein-coding	S1 RNA binding domain 1	19.2872	21.81	29.3924	41.9292	36.1443	45.0004	37.0788	26.9121	0.808759	0.976973
5437	POLR2H	protein-coding	polymerase (RNA) II (DNA directed) polypeptide H	36.2377	84.2668	85.5539	103.539	118.378	112.062	95.2755	70.7802	0.808199	2.74074
22931	RAB18	protein-coding	RAB18, member RAS oncogene family	122.241	219.86	191.503	283.713	243.957	289.085	240.314	229.441	0.80728	5.57181
23567	ZNF346	protein-coding	zinc finger protein 346	76.1471	118.922	116.5	145.337	170.51	181.162	131.992	114.694	0.806685	3.51774
51692	CPSF3	protein-coding	cleavage and polyadenylation specific factor 3, 73kDa	25.3856	50.0231	54.5643	68.8245	69.5465	83.8994	61.9077	45.2739	0.806428	1.86982
28998	MRPL13	protein-coding	mitochondrial ribosomal protein L13	46.346	62.434	68.8843	77.8463	76.7611	76.1436	64.6851	64.8183	0.805867	1.08794
86	ACTL6A	protein-coding	actin-like 6A	58.0618	117.842	148.958	160.021	197.889	235.237	163.903	121.505	0.805804	5.61225
221496	LEMD2	protein-coding	LEM domain containing 2	18.2058	31.124	32.0543	38.4635	38.372	51.3981	37.7293	36.5985	0.805512	0.973136
84295	PHF6	protein-coding	PHD finger protein 6	23.187	26.0708	34.7685	43.8131	44.2482	53.2481	36.0285	34.4757	0.805284	1.03479
79631	EFTUD1	protein-coding	elongation factor Tu GTP binding domain containing 1	9.88187	18.3018	16.6695	19.0124	20.372	20.5011	20.1408	18.0202	0.805157	0.36458
7284	TUFM	protein-coding	Tu translation elongation factor, mitochondrial	59.1157	88.6985	97.5951	95.7588	124.508	125.118	112.183	119.378	0.805087	2.34328
83540	NUF2	protein-coding	NUF2, NDC80 kinetochore complex component, homolog (S. cerevisiae)	9.38797	10.6693	19.5303	23.6907	33.049	31.3582	20.951	27.9873	0.804917	0.920739
8495	PPFIBP2	protein-coding	PTPRF interacting protein, binding protein 2 (liprin beta 2)	3.21943	6.77955	6.19867	8.57607	10.5727	7.53623	8.65345	7.50785	0.804871	0.224749
199704	ZNF585A	protein-coding	zinc finger protein 585A	0	0.891645	2.10606	2.41142	3.31586	2.88057	2.45327	0.927586	0.804637	0.119459
2037	EPB41L2	protein-coding	erythrocyte membrane protein band 4.1-like 2	5.8698	8.02326	9.1238	10.1065	10.4213	12.7924	10.7373	11.5837	0.8045	0.225369
4190	MDH1	protein-coding	malate dehydrogenase 1, NAD (soluble)	257.112	292.329	302.644	385.215	438.97	465.624	432.23	451.529	0.804354	8.60223
51690	LSM7	protein-coding	LSM7 homolog, U6 small nuclear RNA associated (S. cerevisiae)	44.4948	51.081	59.183	66.0949	78.1843	84.9799	61.239	65.8685	0.804274	1.38375
813	CALU	protein-coding	calumenin	49.7384	102.124	105.501	144.025	130.955	120.742	112.742	106.295	0.804068	2.91272
5985	RFC5	protein-coding	replication factor C (activator 1) 5, 36.5kDa	43.8357	46.6507	57.6226	63.624	71.3149	84.5306	66.4943	58.7753	0.80395	1.37429
84823	LMNB2	protein-coding	lamin B2	41.6859	82.0821	129.086	128.729	176.426	172.965	117.455	98.9087	0.803861	4.69728
6616	SNAP25	protein-coding	synaptosomal-associated protein, 25kDa	9.30986	17.0503	17.9607	20.164	21.6625	19.5294	17.6389	18.8758	0.803306	0.389473
253832	ZDHHC20	protein-coding	zinc finger, DHHC-type containing 20	3.31864	21.6417	12.7794	25.6066	35.2107	29.059	32.3614	21.107	0.803256	1.0999
84881	RPUSD4	protein-coding	RNA pseudouridylate synthase domain containing 4	24.7464	33.5928	38.5872	49.6267	48.9708	58.8908	46.3236	33.2032	0.803192	1.16266
118	ADD1	protein-coding	adducin 1 (alpha)	19.237	19.5171	25.4819	30.0058	31.2167	33.851	25.6472	24.2954	0.803031	0.552222
6499	SKIV2L	protein-coding	superkiller viralicidic activity 2-like (S. cerevisiae)	21.5614	48.0241	48.2175	53.2887	71.7081	56.9031	54.2077	54.9555	0.802173	1.46431
7329	UBE2I	protein-coding	ubiquitin-conjugating enzyme E2I (UBC9 homolog, yeast)	73.0449	100.577	124.472	147.691	181.888	164.645	119.858	113.077	0.800928	3.67814
10128	LRPPRC	protein-coding	leucine-rich PPR-motif containing	7.83105	15.5569	18.1835	26.7176	23.8238	33.4734	20.4815	18.4832	0.800185	0.800026
6100	RP9	protein-coding	retinitis pigmentosa 9 (autosomal dominant)	20.8107	27.1394	33.2426	40.0627	33.5979	38.7761	36.0172	29.735	0.800023	0.663508

## Sheet: GO Enrichment +Correlation
Category	Term	Count	%	PValue	Genes	List Total	Pop Hits	Pop Total	Fold Enrichment	Bonferroni	Benjamini	FDR
GOTERM_CC_DIRECT	GO:0005654~nucleoplasm	97	0.225131	3.46498e-21	NCBP2, IDE, PPP2R5C, LSM7, SNRPD1, SAE1, INTS2, XRCC1, CUL3, DDX17, DNAJC7, GIT2, MLST8, RBM10, STAG1, POLK, RNASEH2A, RFC5, PSMA2, RCL1, PSMA1, DCAF7, YME1L1, LRPPRC, ADD1, BANF1, PSMB4, PSMB7, VRK1, CSE1L, NUP50, DHODH, ZC3H13, YEATS4, TAF7, FDPS, SMAD4, SAP18, USF1, NDUFV3, HNRNPH3, HDAC3, WDR61, PSMC3, POMP, NUTF2, POP5, PHF6, PTGES3, DPP3, COPS2, RSF1, COPS5, PRKAG1, SKIV2L2, SENP6, PSMD1, P…	239	2784	18224	2.65674	1.16077e-18	1.16077e-18	4.70811e-18
GOTERM_CC_DIRECT	GO:0005829~cytosol	92	0.213526	2.06219e-13	PTGES3, NCBP2, ALAD, SEC31A, NARS, PRKAG1, LSM7, PPP2R5C, IDE, SNRPD1, SAE1, IARS2, CNOT6, CUL3, AP2B1, TPP2, PSMD1, PSMD2, DNAJC7, MLST8, TOP2B, PSMD6, SEC24D, NSF, STAG1, EIF2B5, PAN2, NUDT1, NCALD, SNUPN, AARS, CYCS, UBE2I, ECT2, PSMA2, PSMA1, RAB18, EIF2S2, HAUS8, NUP43, MDH1, ADD1, SRGAP2, BCAT1, POLR2H, USP7, HAUS6, BANF1, IARS, PSMB4, CYLD, VRK1, PSMB7, DDHD1, CSE1L, RB1CC1, CAMK2D, VPS35,…	239	3315	18224	2.11617	6.90664e-11	3.45333e-11	2.80131e-10
GOTERM_BP_DIRECT	GO:0060071~Wnt signaling pathway, planar cell polarity pathway	13	0.0301722	5.23286e-09	PSMA2, PSMA1, CTHRC1, PSMB4, PSMD14, PSMB7, AP2B1, PSMD11, PSMC3, PSMD1, PSMD2, PSMD6, AP2M1	234	92	16792	10.1401	6.34744e-06	6.34744e-06	8.47115e-06
GOTERM_CC_DIRECT	GO:0005634~nucleus	113	0.262266	1.07018e-08	NCBP2, ALAD, MAEA, SEPT2, PPP2R5C, IDE, SNRPD1, RP9, SAE1, CLK1, XRCC1, CNOT6, CUL3, DDX17, RBM10, STAG1, EIF2B5, PAN2, POLK, NUDT1, SUCLG2, HMG20A, OGFOD1, PSMA2, PSMA1, NAA20, EIF2S2, CSNK1G3, AMFR, LRPPRC, ADD1, BANF1, ZNF330, PSMB4, VRK1, ARIH2, PSMB7, CSE1L, ZNF71, MBNL3, FBXO7, DUSP23, SMAD4, NUF2, TSN, KCTD5, ZNF585A, USF1, PTPN11, HDAC3, NOSIP, HNRNPH3, WDR61, PSMC3, UBA3, POMP, PTTG1IP, …	239	5415	18224	1.5912	3.58508e-06	1.19503e-06	1.45412e-05
GOTERM_BP_DIRECT	GO:0038061~NIK/NF-kappaB signaling	11	0.0255303	2.33204e-08	PSMA2, PSMA1, PSMB4, PSMD14, PSMB7, PSMC3, PSMD11, UBA3, PSMD1, PSMD2, PSMD6	234	66	16792	11.9601	2.82873e-05	1.41437e-05	3.7752e-05
GOTERM_BP_DIRECT	GO:0043161~proteasome-mediated ubiquitin-dependent protein catabolic process	17	0.039456	2.4582e-08	MAEA, DDB1, PPP2R5C, KCTD5, SIRT1, PSMA2, CUL3, PSMA1, PSMB4, PSMD14, PSMB7, CUL4A, PSMD11, PSMC3, PSMD1, PSMD2, PSMD6	234	203	16792	6.00952	2.98175e-05	9.93928e-06	3.97942e-05
GOTERM_BP_DIRECT	GO:0006521~regulation of cellular amino acid metabolic process	10	0.0232094	2.99488e-08	PSMA2, PSMA1, PSMB4, PSMD14, PSMB7, PSMC3, PSMD11, PSMD1, PSMD2, PSMD6	234	51	16792	14.0707	3.63272e-05	9.08193e-06	4.84822e-05
GOTERM_CC_DIRECT	GO:0000502~proteasome complex	10	0.0232094	7.86928e-08	PSMA2, PSMA1, PSMB4, PSMD14, PSMB7, PSMC3, PSMD11, PSMD1, PSMD2, PSMD6	239	60	18224	12.7085	2.63617e-05	6.5905e-06	0.000106925
GOTERM_BP_DIRECT	GO:0031145~anaphase-promoting complex-dependent catabolic process	11	0.0255303	1.36042e-07	PSMA2, CUL3, PSMA1, PSMB4, PSMD14, PSMB7, PSMC3, PSMD11, PSMD1, PSMD2, PSMD6	234	79	16792	9.99199	0.000165006	3.30034e-05	0.00022023
GOTERM_MF_DIRECT	GO:0005515~protein binding	161	0.373671	1.54383e-07	NCBP2, SEC31A, SEPT2, LSM7, PPP2R5C, IDE, SNRPD1, RP9, INTS2, FSTL1, SAE1, CLK1, XRCC1, CNOT6, MKRN2, CUL3, CISD2, DDX17, PGRMC1, DNAJC7, GIT2, MLST8, RBM10, STAG1, EIF2B5, PAN2, RPUSD4, NUDT1, NCALD, HMG20A, ERGIC1, RFC5, PSMA2, PSMA1, DCAF7, RAB18, EIF2S2, AMFR, NUP43, LRPPRC, MDH1, SLC38A2, CCDC12, SNX4, BANF1, HADHA, ZNF330, CALU, PSMB4, VRK1, ARIH2, PSMB7, CSE1L, GORASP2, NUP50, SKA3, MBNL3,…	234	8785	16881	1.32211	7.05506e-05	7.05506e-05	0.000219506
GOTERM_BP_DIRECT	GO:0002479~antigen processing and presentation of exogenous peptide antigen via MHC class I, TAP-dependent	10	0.0232094	2.0164e-07	PSMA2, PSMA1, PSMB4, PSMD14, PSMB7, PSMC3, PSMD11, PSMD1, PSMD2, PSMD6	234	63	16792	11.3906	0.000244559	4.0764e-05	0.000326421
GOTERM_BP_DIRECT	GO:0051436~negative regulation of ubiquitin-protein ligase activity involved in mitotic cell cycle	10	0.0232094	5.76264e-07	PSMA2, PSMA1, PSMB4, PSMD14, PSMB7, PSMC3, PSMD11, PSMD1, PSMD2, PSMD6	234	71	16792	10.1071	0.000698765	9.98534e-05	0.000932873
GOTERM_CC_DIRECT	GO:0005739~mitochondrion	41	0.0951585	5.96218e-07	BCAT1, TUFM, SPG7, NDUFB5, NARS, MRPS14, NIT2, GTPBP10, IDE, IARS2, HADHA, PARL, DHODH, MRPL18, VPS35, NDUFS3, NDUFS2, DNAJC19, MRPL35, FBXO7, AP2M1, C14ORF119, RPUSD4, DNM1L, NUDT1, ACADM, SUCLG2, CYCS, AARS, FDPS, BAD, SIRT1, PTPN11, NDUFV3, LAP3, MRPS9, YME1L1, ALKBH3, LRPPRC, CROT, MDH1	239	1331	18224	2.34883	0.000199713	3.99458e-05	0.00081012
GOTERM_BP_DIRECT	GO:0006283~transcription-coupled nucleotide-excision repair	10	0.0232094	8.2491e-07	RFC5, POLR2H, USP7, COPS2, POLR2G, POLK, CUL4A, COPS5, DDB1, XRCC1	234	74	16792	9.69739	0.00100012	0.000125069	0.00133539
GOTERM_BP_DIRECT	GO:0051437~positive regulation of ubiquitin-protein ligase activity involved in regulation of mitotic cell cycle transition	10	0.0232094	1.03805e-06	PSMA2, PSMA1, PSMB4, PSMD14, PSMB7, PSMC3, PSMD11, PSMD1, PSMD2, PSMD6	234	76	16792	9.4422	0.00125837	0.000139897	0.00168042
GOTERM_BP_DIRECT	GO:0000209~protein polyubiquitination	14	0.0324932	1.797e-06	PSMA2, CUL3, PSMB4, PSMA1, ARIH2, PSMB7, PSMD14, PSMC3, PSMD11, TPP2, PSMD1, PSMD2, AMFR, PSMD6	234	184	16792	5.46005	0.00217739	0.000217953	0.00290901
GOTERM_CC_DIRECT	GO:0022624~proteasome accessory complex	6	0.0139256	1.98305e-06	PSMD14, PSMC3, PSMD11, PSMD1, PSMD2, PSMD6	239	17	18224	26.9121	0.000664101	0.000110714	0.00269447
GOTERM_BP_DIRECT	GO:0002223~stimulatory C-type lectin receptor signaling pathway	11	0.0255303	1.98895e-06	PSMA2, PSMA1, PSMB4, PSMD14, PSMB7, PSMC3, PSMD11, PSMD1, PSMD2, PSMD6, TAB2	234	105	16792	7.51779	0.00240969	0.000219303	0.00321974
GOTERM_BP_DIRECT	GO:0090090~negative regulation of canonical Wnt signaling pathway	13	0.0301722	2.94291e-06	CTHRC1, PSMA2, CUL3, CYLD, PSMB4, PSMA1, PSMB7, PSMD14, PSMC3, PSMD11, PSMD1, PSMD2, PSMD6	234	163	16792	5.72324	0.0035634	0.000297436	0.00476399
GOTERM_CC_DIRECT	GO:0005737~cytoplasm	102	0.236736	3.36828e-06	NCBP2, CTHRC1, SEC31A, SEPT2, MAEA, NIT2, IDE, RP9, IARS2, CLK1, DNAJC7, MLST8, PLS3, EIF2B5, NUDT1, AARS, RNASEH2A, OGFOD1, PSMA2, PSMA1, DCAF7, NAA20, EIF2S2, CSNK1G3, MDH1, SNX4, BANF1, PSMB4, PSMB7, ARIH2, VRK1, CSE1L, NUP50, DHODH, SKA3, MBNL3, FBXO7, DUSP23, SMAD4, FDPS, SAP18, OXSR1, PTPN11, NOSIP, HDAC3, WDR61, PSMC3, POMP, PTTG1IP, DPP3, PTGES3, COPS2, TBCCD1, SEPHS1, COPS5, NARS, ZNF346…	239	5222	18224	1.48939	0.00112774	0.000161184	0.00457663
GOTERM_BP_DIRECT	GO:0033209~tumor necrosis factor-mediated signaling pathway	11	0.0255303	5.74239e-06	PSMA2, PSMA1, PSMB4, PSMD14, PSMB7, PSMC3, PSMD11, PSMD1, PSMD2, ADAM17, PSMD6	234	118	16792	6.68956	0.00694134	0.000535667	0.00929558
GOTERM_BP_DIRECT	GO:0090263~positive regulation of canonical Wnt signaling pathway	11	0.0255303	6.67595e-06	PSMA2, PSMA1, PSMB4, PSMD14, PSMB7, PSMC3, PSMD11, PSMD1, PSMD2, VPS35, PSMD6	234	120	16792	6.57806	0.00806526	0.000578258	0.0108067
GOTERM_BP_DIRECT	GO:0006511~ubiquitin-dependent protein catabolic process	13	0.0301722	9.16209e-06	PSMA2, CUL3, USP7, PSMA1, CYLD, PSMD14, ARIH2, CUL4A, PSMD11, UBE2I, AMFR, FBXO8, FBXO7	234	182	16792	5.12576	0.0110521	0.000740637	0.0148309
GOTERM_BP_DIRECT	GO:0043488~regulation of mRNA stability	10	0.0232094	1.3223e-05	PSMA2, PSMA1, PSMB4, PSMD14, PSMB7, PSMC3, PSMD11, PSMD1, PSMD2, PSMD6	234	103	16792	6.96706	0.0159116	0.00100197	0.0214036

## Sheet: -Correlation Eya2
geneid	symbol	gene_type	description	0hr	3d	5d	7d	10d	14d	21d	28d	Rsquare	SLOPE
5236	PGM1	protein-coding	phosphoglucomutase 1	177.185	146.153	129.183	89.5416	80.0155	70.0868	88.0288	103.847	0.988661	-4.29482
5213	PFKM	protein-coding	phosphofructokinase, muscle	70.1693	38.7222	27.0896	8.04989	5.3926	7.04082	13.9465	16.9528	0.963923	-2.51922
5565	PRKAB2	protein-coding	protein kinase, AMP-activated, beta 2 non-catalytic subunit	5.72093	3.82007	1.95302	1.1181	0	0.445209	0.76087	1.29028	0.961002	-0.221399
1805	DPT	protein-coding	dermatopontin	496.822	304.218	282.204	167.601	87.5467	50.5114	149.486	226.356	0.959323	-16.2338
387890	TMEM233	protein-coding	transmembrane protein 233	12.5798	8.22113	5.1782	1.48225	0	0.885313	3.02603	1.99559	0.958969	-0.490983
7134	TNNC1	protein-coding	troponin C type 1 (slow)	866.603	456.557	271.348	50.4368	25.2219	33.2315	142.114	238.872	0.958053	-32.5906
1364	CLDN4	protein-coding	claudin 4	117.315	105.952	81.4306	61.8889	55.7031	46.8147	65.6047	77.2931	0.957532	-2.79443
4606	MYBPC2	protein-coding	myosin binding protein C, fast type	125.761	79.4566	42.4653	11.2457	7.62961	2.34828	11.8543	16.5524	0.955252	-4.99926
2948	GSTM4	protein-coding	glutathione S-transferase mu 4	293.684	258.516	169.199	89.9687	45.0039	59.7927	103.37	165.356	0.953323	-10.3508
4621	MYH3	protein-coding	myosin, heavy chain 3, skeletal muscle, embryonic	228.036	142.536	69.415	20.1188	10.7784	4.02429	54.8637	63.1867	0.952394	-8.67395
1548	CYP2A6	protein-coding	cytochrome P450, family 2, subfamily A, polypeptide 6	19.6037	13.3726	10.8608	5.41265	0.883937	4.86335	4.59322	5.31393	0.948041	-0.688258
10345	TRDN	protein-coding	triadin	16.6507	11.8716	5.06279	1.99281	1.21789	0.717682	4.06834	5.28076	0.945275	-0.634715
6261	RYR1	protein-coding	ryanodine receptor 1 (skeletal)	44.4367	25.375	15.287	4.87237	2.75875	3.46822	11.8296	10.0803	0.944301	-1.59764
6203	RPS9	protein-coding	ribosomal protein S9	2065.81	1927.75	1816.14	1452.45	1554.16	1505.68	1563.16	1688.49	0.943094	-24.8758
900	CCNG1	protein-coding	cyclin G1	360.468	286.486	179.61	124.219	113.637	114.004	168.684	183.07	0.941578	-10.0136
1512	CTSH	protein-coding	cathepsin H	324.844	268.138	142.852	71.2579	65.2334	38.659	64.5991	89.2805	0.94038	-12.0089
7138	TNNT1	protein-coding	troponin T type 1 (skeletal, slow)	348.677	168.641	109.328	36.6115	15.6154	14.7647	68.825	90.8652	0.940328	-12.5059
7148	TNXB	protein-coding	tenascin XB	30.7804	18.1978	8.81803	0.745686	3.0761	1.48757	3.29837	5.73676	0.935424	-1.17574
6345	SRL	protein-coding	sarcalumenin	600.97	311.869	188.167	52.6364	28.2065	18.4691	154.793	164.195	0.935323	-21.7244
8789	FBP2	protein-coding	fructose-1,6-bisphosphatase 2	22.0888	11.2178	6.8954	1.75754	0	0.273369	0.934383	1.34684	0.934902	-0.87218
9370	ADIPOQ	protein-coding	adiponectin, C1Q and collagen domain containing	183.614	91.0124	56.9815	14.8868	7.22481	4.52944	23.7233	21.1742	0.93434	-6.89541
203	AK1	protein-coding	adenylate kinase 1	143.625	65.882	45.7684	9.99482	10.1851	3.34014	21.1102	26.6045	0.932377	-5.22684
342527	SMTNL2	protein-coding	smoothelin-like 2	19.1608	12.845	6.89969	1.76941	3.55729	0.777435	4.41112	4.10817	0.930585	-0.70366
4291	MLF1	protein-coding	myeloid leukemia factor 1	70.9451	30.4719	21.4259	6.90721	1.96508	0.758715	7.61786	11.5458	0.928561	-2.61279
1158	CKM	protein-coding	creatine kinase, muscle	2299.55	952.023	908.795	224.788	119.73	33.4428	458.422	516.918	0.927638	-82.2922
4607	MYBPC3	protein-coding	myosin binding protein C, cardiac	60.611	32.7883	19.156	7.08077	3.24551	4.43057	16.2911	12.5187	0.9263	-2.14949
23066	CAND2	protein-coding	cullin-associated and neddylation-dissociated 2 (putative)	25.1326	14.8963	11.545	2.5179	6.92456	2.50647	4.71196	7.74836	0.922524	-0.854431
5230	PGK1	protein-coding	phosphoglycerate kinase 1	246.725	244.13	202.004	170.348	148.71	145.748	153.109	185.014	0.921807	-4.56488
2027	ENO3	protein-coding	enolase 3 (beta, muscle)	503.009	266.058	218.997	104.845	111.445	62.8413	89.7038	122.694	0.921169	-16.2938
1073	CFL2	protein-coding	cofilin 2 (muscle)	168.569	78.6955	74.4799	22.3143	16.423	22.7409	48.9543	43.4166	0.917583	-5.57286
58529	MYOZ1	protein-coding	myozenin 1	353.753	173.294	90.7224	28.5337	19.8548	6.21723	32.6979	39.8464	0.916617	-13.1965
4619	MYH1	protein-coding	myosin, heavy chain 1, skeletal muscle, adult	75.8101	47.8593	28.4441	8.7462	5.26045	2.31288	30.1572	23.8685	0.91546	-2.74703
6263	RYR3	protein-coding	ryanodine receptor 3	15.3185	12.9781	6.43397	2.38339	0.893816	0.345102	2.21169	1.33353	0.914783	-0.650302
270	AMPD1	protein-coding	adenosine monophosphate deaminase 1	15.5609	6.57619	6.75212	1.62718	0.559369	0.531292	4.15238	5.63325	0.913052	-0.547147
30845	EHD3	protein-coding	EH-domain containing 3	30.3836	24.7354	23.5877	18.41	18.9968	14.6185	16.4379	21.4612	0.909956	-0.565419
5837	PYGM	protein-coding	phosphorylase, glycogen, muscle	255.574	169.381	131.322	90.1269	84.531	68.2006	71.7027	76.0365	0.907459	-7.2699
8736	MYOM1	protein-coding	myomesin 1, 185kDa	21.2	13.7725	8.38706	2.11542	1.93923	0.772133	8.9912	8.00163	0.904579	-0.763395
4625	MYH7	protein-coding	myosin, heavy chain 7, cardiac muscle, beta	566.712	239.754	143.684	38.4721	16.456	4.15013	44.93	51.6927	0.903956	-21.0578
84467	FBN3	protein-coding	fibrillin 3	136.765	115.714	75.8424	47.9495	22.4774	8.08679	22.8746	27.5047	0.903589	-5.27336
29765	TMOD4	protein-coding	tropomodulin 4 (muscle)	17.7085	6.31722	5.19824	0.776341	0	0	2.64152	3.38448	0.902747	-0.644653
6210	RPS15A	protein-coding	ribosomal protein S15a	7509.47	6141.1	5237.4	5057.58	4458.01	4894.59	5031.23	5520.66	0.901262	-105.639
84532	ACSS1	protein-coding	acyl-CoA synthetase short-chain family member 1	169.957	127.059	98.8162	75.9598	89.5283	62.854	88.1761	95.3512	0.899541	-3.70078
4634	MYL3	protein-coding	myosin, light chain 3, alkali; ventricular, skeletal, slow	942.952	373.805	255.758	67.1466	26.9145	21.9538	168.053	268.618	0.898609	-33.292
226	ALDOA	protein-coding	aldolase A, fructose-bisphosphate	1326.16	1065.34	783.71	399.384	259.242	119	174.672	211.056	0.896047	-50.563
4359	MPZ	protein-coding	myelin protein zero	54.1498	18.4617	22.7519	4.36869	2.42476	1.30559	7.27711	17.0495	0.894492	-1.91781
4155	MBP	protein-coding	myelin basic protein	287.284	101.741	77.0788	17.8396	4.04209	2.07994	15.3623	36.7511	0.89417	-10.5365
23676	SMPX	protein-coding	small muscle protein, X-linked	81.5542	35.0743	25.1828	7.80007	0	2.19109	21.7936	28.8046	0.893771	-2.87423
1278	COL1A2	protein-coding	collagen, type I, alpha 2	4058.51	2715.67	1751.37	1610.63	1398.73	1077.31	1777.65	2018.11	0.888956	-103.439
4622	MYH4	protein-coding	myosin, heavy chain 4, skeletal muscle	58.184	60.9708	36.0436	11.299	5.71136	1.79197	23.6881	24.2391	0.888765	-2.47656
201140	DHRS7C	protein-coding	dehydrogenase/reductase (SDR family) member 7C	111.873	50.681	37.9119	11.9328	5.3426	3.48093	36.3548	40.4014	0.886918	-3.83746
487	ATP2A1	protein-coding	ATPase, Ca++ transporting, cardiac muscle, fast twitch 1	622.108	264.469	132.07	35.0827	20.9258	5.89399	52.531	49.1817	0.886716	-22.9632
58	ACTA1	protein-coding	actin, alpha 1, skeletal muscle	2665.73	1015.6	649.723	210.132	93.9649	26.3265	356.725	382.849	0.885669	-94.8877
2200	FBN1	protein-coding	fibrillin 1	16.9116	16.9115	13.5524	6.27598	2.30438	2.48959	7.39814	10.0598	0.884339	-0.644748
4815	NINJ2	protein-coding	ninjurin 2	1.47583	0.945495	1.11038	0	0	0.23175	0.162321	0.695498	0.883468	-0.0613914
51673	TPPP3	protein-coding	tubulin polymerization-promoting protein family member 3	17.3782	14.5952	11.1533	6.96569	6.38552	4.62271	5.13519	12.5041	0.883249	-0.519976
5654	HTRA1	protein-coding	HtrA serine peptidase 1	79.1018	78.6283	69.1321	39.8688	40.115	30.7663	45.5051	47.1033	0.882893	-2.07632
7136	TNNI2	protein-coding	troponin I type 2 (skeletal, fast)	1847.69	707.998	453.28	112.368	69.0123	18.772	360.581	368.204	0.880399	-64.8905
8531	CSDA	protein-coding	cold shock domain protein A	655.815	575.701	565.367	470.41	448.675	364.366	405.395	479.128	0.880221	-10.5688
51807	TUBA8	protein-coding	tubulin, alpha 8	3.77531	3.58441	1.81422	0	0	0	0.471196	0	0.879969	-0.180022
844	CASQ1	protein-coding	calsequestrin 1 (fast-twitch, skeletal muscle)	601.516	216.08	135.934	41.9771	10.5395	5.57777	63.432	80.6517	0.878182	-21.5439
4633	MYL2	protein-coding	myosin, light chain 2, regulatory, cardiac, slow	1883.27	730.783	454.833	139.702	52.3207	47.5963	352.941	574.007	0.877863	-65.5567
284612	SYPL2	protein-coding	synaptophysin-like 2	30.3629	26.8323	25.0546	6.57417	0	0.951902	12.9454	15.1731	0.876693	-1.28711
100128267	LOC100128267	protein-coding	hypothetical LOC100128267	4.44253	2.19253	1.10072	0.821706	0	0	0.982333	1.91143	0.876461	-0.157859
1520	CTSS	protein-coding	cathepsin S	123.527	120.245	108.487	62.8852	45.8023	30.412	50.3719	75.1943	0.874287	-3.92448
3908	LAMA2	protein-coding	laminin, alpha 2	18.3939	12.0156	7.39156	4.22588	2.11304	5.20203	7.75575	5.03032	0.872253	-0.566538
4703	NEB	protein-coding	nebulin	14.7975	16.2674	9.6823	3.107	1.20938	0.583676	4.02815	3.52095	0.871727	-0.66775
9200	PTPLA	protein-coding	protein tyrosine phosphatase-like (proline instead of catalytic arginine), member A	106.408	50.3393	37.8709	13.4308	6.32181	9.59075	40.5686	38.6887	0.870933	-3.50051
161247	FITM1	protein-coding	fat storage-inducing transmembrane protein 1	47.7062	23.7064	12.3188	2.56453	0	3.06346	15.4971	8.87833	0.870687	-1.69826
2166	FAAH	protein-coding	fatty acid amide hydrolase	29.3756	19.9366	13.9546	9.3686	11.3012	4.19827	4.92587	10.0733	0.870476	-0.904387
10516	FBLN5	protein-coding	fibulin 5	84.5088	53.6056	60.7261	32.4238	28.8097	39.674	41.427	38.2423	0.870168	-1.98837
29895	MYLPF	protein-coding	myosin light chain, phosphorylatable, fast skeletal muscle	5859.93	2170.15	1355.13	423.038	301.371	69.1446	758.271	720.003	0.869039	-206.382
2593	GAMT	protein-coding	guanidinoacetate N-methyltransferase	113.133	84.1903	90.3127	48.9579	39.8258	40.023	72.6281	58.5077	0.868702	-2.85762
7167	TPI1	protein-coding	triosephosphate isomerase 1	576.388	376.37	322.287	261.384	284.335	256.259	270.194	314.655	0.868387	-11.5285
342035	GLDN	protein-coding	gliomedin	31.1689	11.63	12.4655	5.21397	5.60748	1.39181	3.56795	8.51551	0.866112	-1.0179
1490	CTGF	protein-coding	connective tissue growth factor	203.348	105.644	120.846	21.453	36.9442	22.3919	81.712	47.5648	0.86455	-6.75343
57467	HHATL	protein-coding	hedgehog acyltransferase-like	41.043	16.3459	11.3162	1.32214	3.63605	0.210582	10.7858	9.35784	0.86284	-1.41352
1346	COX7A1	protein-coding	cytochrome c oxidase subunit VIIa polypeptide 1 (muscle)	292.276	113.983	71.6674	30.4398	16.0988	12.1207	19.9177	20.7161	0.862483	-10.3528
6442	SGCA	protein-coding	sarcoglycan, alpha (50kDa dystrophin-associated glycoprotein)	17.9262	8.67308	3.04545	1.16234	0	0	4.70631	2.68266	0.860222	-0.651253
3383	ICAM1	protein-coding	intercellular adhesion molecule 1	30.5661	20.4842	16.618	14.9455	4.06148	11.514	10.2529	11.4207	0.859519	-0.858594
4632	MYL1	protein-coding	myosin, light chain 1, alkali; skeletal, fast	5900.43	1945.7	1503.62	451.639	205.73	83.286	889.717	818.729	0.858934	-204.806
56203	LMOD3	protein-coding	leiomodin 3 (fetal)	17.4059	6.69	4.80133	3.05416	0.839935	0.243224	4.15674	3.28951	0.858499	-0.583043
219348	PLAC9	protein-coding	placenta-specific 9	235.021	110.858	115.729	39.6781	49.211	65.4149	87.3672	94.5213	0.856704	-6.59838
92235	DUSP27	protein-coding	dual specificity phosphatase 27 (putative)	3.72267	2.55005	2.07047	1.50646	0.592698	0.17163	1.61325	0.829012	0.855355	-0.124084
761	CA3	protein-coding	carbonic anhydrase III, muscle specific	24.1528	9.8124	5.45337	1.56102	0	0	1.06228	10.8084	0.854504	-0.892556
4608	MYBPH	protein-coding	myosin binding protein H	169.528	68.0674	41.9229	14.9597	4.33649	2.14046	49.7088	33.8582	0.852737	-5.82501
3543	IGLL1	protein-coding	immunoglobulin lambda-like polypeptide 1	10.4008	7.42627	6.13927	3.01261	0.920565	1.866	4.55576	7.45007	0.851902	-0.346311
4747	NEFL	protein-coding	neurofilament, light polypeptide	0.835306	0.54627	0.619076	0.298458	0	0	0.203102	0.114806	0.851403	-0.0331853
9513	FXR2	protein-coding	fragile X mental retardation, autosomal homolog 2	98.2408	81.7261	60.8044	61.5827	55.4057	49.7539	65.0914	59.9595	0.850937	-1.69676
5816	PVALB	protein-coding	parvalbumin	3027.53	1023.44	720.35	234.187	114.82	26.2097	126.977	121.1	0.848834	-108.836
10580	SORBS1	protein-coding	sorbin and SH3 domain containing 1	6.30863	4.36347	2.94777	2.96606	1.96895	1.54757	3.20163	3.80207	0.846319	-0.159315
55222	LRRC20	protein-coding	leucine rich repeat containing 20	9.69971	6.02422	4.89127	4.07307	1.40019	1.68265	4.85055	5.48367	0.845475	-0.279926
55026	FAM70A	protein-coding	family with sequence similarity 70, member A	9.09617	3.86554	2.4901	0.950384	1.30684	0	0.64674	0.365578	0.845344	-0.322013
6123	RPL3L	protein-coding	ribosomal protein L3-like	12.4078	9.38517	2.55781	0.976225	1.34237	0	0	0	0.843724	-0.515589
7125	TNNC2	protein-coding	troponin C type 2 (fast)	1499.99	468.291	335.38	71.7693	36.2666	14.6689	262.064	275.474	0.84314	-51.7096
57644	MYH7B	protein-coding	myosin, heavy chain 7B, cardiac muscle, beta	23.4321	26.8327	17.8433	6.76532	3.24784	1.15472	9.43811	8.2071	0.842285	-1.01239
10146	G3BP1	protein-coding	GTPase activating protein (SH3 domain) binding protein 1	355.347	320.196	326.185	282.499	253.095	233.034	265.982	256.802	0.841934	-4.56206
6253	RTN2	protein-coding	reticulon 2	128.738	44.5033	39.2618	12.1076	9.66704	7.46488	32.6914	25.2399	0.841516	-4.21261
7360	UGP2	protein-coding	UDP-glucose pyrophosphorylase 2	53.7196	43.4609	33.5846	29.1025	27.0988	30.7129	35.2375	29.0787	0.841003	-0.967868
80760	ITIH5	protein-coding	inter-alpha (globulin) inhibitor H5	14.2053	8.74247	5.99506	5.72025	2.09753	3.64434	5.70922	3.5206	0.83884	-0.406601
7168	TPM1	protein-coding	tropomyosin 1 (alpha)	1305.69	511.031	417.845	231.008	202.33	189.199	274.459	280.043	0.837753	-39.6933
114899	C1QTNF3	protein-coding	C1q and tumor necrosis factor related protein 3	2.77601	1.81031	0.534492	0.611989	0	0.487369	0.832922	0.941641	0.837289	-0.0942746
2597	GAPDH	protein-coding	glyceraldehyde-3-phosphate dehydrogenase	4142.74	2689.86	2690.04	1964.18	2206.01	1674.24	1622.88	1975.63	0.836357	-87.6617
7178	TPT1	protein-coding	tumor protein, translationally-controlled 1	2676.37	2374.91	2446.48	1722.84	1864.72	1818.99	2141.96	1969.48	0.835833	-36.404
10324	KBTBD10	protein-coding	kelch repeat and BTB (POZ) domain containing 10	1084.09	341.068	247.009	77.7235	33.4659	23.3103	170.489	124.509	0.835552	-37.1769
88	ACTN2	protein-coding	actinin, alpha 2	33.6533	13.3757	7.49362	2.33616	1.5126	1.34579	9.32527	11.1105	0.835544	-1.12761
7135	TNNI1	protein-coding	troponin I type 1 (skeletal, slow)	1360.78	602.517	330.9	120.894	59.7127	85.3696	409.678	567.162	0.834875	-45.4477
2944	GSTM1	protein-coding	glutathione S-transferase mu 1	765.344	816.16	619.974	478.571	299.272	281.737	469.645	568.982	0.83117	-20.7714
8076	MFAP5	protein-coding	microfibrillar associated protein 5	113.128	83.4223	66.3163	41.7393	32.7111	11.812	14.0879	15.7086	0.830523	-3.93347
59	ACTA2	protein-coding	actin, alpha 2, smooth muscle, aorta	65.1885	42.6336	35.6662	24.495	28.201	32.4879	30.0719	29.0823	0.829021	-1.38021
632	BGLAP	protein-coding	bone gamma-carboxyglutamate (gla) protein	1.28445	0.943267	1.11399	0	0	0	0	0	0.825596	-0.0617979
1277	COL1A1	protein-coding	collagen, type I, alpha 1	6731.91	3205.32	1919.24	1389.47	1450.61	1087.46	1986.28	2825.87	0.824883	-193.497
6525	SMTN	protein-coding	smoothelin	2.63174	1.07264	0.804409	0.241743	0	0.577551	0.164507	0.18598	0.821839	-0.0905794
7140	TNNT3	protein-coding	troponin T type 3 (skeletal, fast)	1124.87	328.999	218.324	52.5141	21.431	11.0197	201.01	192.772	0.819198	-38.3147
6217	RPS16	protein-coding	ribosomal protein S16	2912.37	2689.38	2583.97	2446.26	2359.02	2460.6	2650.9	2542.45	0.81897	-18.2589
8763	CD164	protein-coding	CD164 molecule, sialomucin	558.488	401.791	262.015	244.64	232.661	211.22	273.321	383.268	0.817398	-12.4809
89	ACTN3	protein-coding	actinin, alpha 3	309.88	88.479	64.3079	12.1013	8.84641	2.15182	58.0039	62.6409	0.817154	-10.499
131377	KBTBD5	protein-coding	kelch repeat and BTB (POZ) domain containing 5	40.4939	43.2132	20.0349	8.32793	3.64677	3.91122	21.6448	13.6701	0.815011	-1.62045
27231	ITGB1BP3	protein-coding	integrin beta 1 binding protein 3	530.449	290.357	336.121	212.191	224.13	241.448	218.934	251.433	0.813646	-11.1806
6230	RPS25	protein-coding	ribosomal protein S25	13384.6	10376.2	9035.2	9684.65	8010.49	8175.28	9016.67	9184.89	0.810242	-178.711
6139	RPL17	protein-coding	ribosomal protein L17	922.559	706.249	730.381	684.317	648.643	600.872	648.753	654.177	0.807808	-10.3171
51303	FKBP11	protein-coding	FK506 binding protein 11, 19 kDa	166.048	116.668	98.2342	77.2715	92.7014	62.1857	55.766	77.7921	0.806165	-3.6964
3949	LDLR	protein-coding	low density lipoprotein receptor	0.373119	0.30415	0.1796	0.205641	0	0	0.139939	0.158205	0.805385	-0.0136611
7273	TTN	protein-coding	titin	32.3758	37.1882	26.5773	10.0745	5.8382	2.18032	13.1937	8.00197	0.802763	-1.38018
7123	CLEC3B	protein-coding	C-type lectin domain family 3, member B	157.307	121.204	135.845	84.6397	62.6608	26.3108	70.0049	64.6119	0.801472	-4.57818

## Sheet: GO Enrichment -Correlation
Category	Term	Count	%	PValue	Genes	List Total	Pop Hits	Pop Total	Fold Enrichment	Bonferroni	Benjamini	FDR
GOTERM_BP_DIRECT	GO:0030049~muscle filament sliding	20	0.106746	2.89812e-32	TNNC2, MYL2, ACTA1, MYBPC2, MYL3, TNNC1, MYH3, MYL1, MYBPC3, MYH4, ACTN2, MYH7, ACTN3, TTN, TPM1, TNNI1, TNNI2, TNNT3, TNNT1, NEB	113	38	16792	78.2115	1.93304e-29	1.93304e-29	4.34228e-29
GOTERM_BP_DIRECT	GO:0006936~muscle contraction	19	0.101409	1.14301e-20	ACTA1, MYBPC2, MYH1, ACTA2, MYL1, MYLPF, MYH4, MYH7, ACTN3, TTN, TPM1, TRDN, SORBS1, RYR1, GAMT, TMOD4, MYOM1, LMOD3, SGCA	113	107	16792	26.3872	7.62391e-18	3.81195e-18	1.71259e-17
GOTERM_MF_DIRECT	GO:0008307~structural constituent of muscle	14	0.0747225	3.49865e-19	MYBPC2, MYL2, MYL3, MYBPC3, MYL1, MYLPF, ACTN2, ACTN3, TTN, TPM1, SMTN, NEB, MYBPH, MYOM1	110	42	16881	51.1545	6.5075e-17	6.5075e-17	4.33305e-16
GOTERM_CC_DIRECT	GO:0005859~muscle myosin complex	8	0.0426985	3.18947e-12	MYH1, MYL3, MYH3, MYL1, MYH4, MYLPF, MYH7, TTN	114	16	18224	79.9298	5.58154e-10	5.58154e-10	3.91011e-09
GOTERM_BP_DIRECT	GO:0006942~regulation of striated muscle contraction	7	0.0373612	6.35553e-12	TNNT3, MYL2, MYL3, ATP2A1, MYBPH, MYBPC3, TNNI1	113	9	16792	115.579	4.2391e-09	1.41303e-09	9.52248e-09
GOTERM_BP_DIRECT	GO:0060048~cardiac muscle contraction	10	0.0533732	1.36655e-11	MYL2, MYL3, TNNC1, MYL1, MYBPC3, MYH7, TTN, TPM1, TNNI1, TNNI2	113	45	16792	33.0226	9.1149e-09	2.27872e-09	2.04752e-08
GOTERM_MF_DIRECT	GO:0003779~actin binding	17	0.0907344	2.87799e-11	ALDOA, TNNC2, MYBPC2, MYH1, MYBPC3, MYH4, MYOZ1, MYH7, ACTN3, TPM1, TNNI1, TNNI2, TNNT3, SMTN, NEB, SORBS1, MYH7B	110	278	16881	9.38447	5.35308e-09	2.67654e-09	3.56437e-08
GOTERM_CC_DIRECT	GO:0030017~sarcomere	9	0.0480359	8.91191e-11	MYL2, ACTA1, MYL3, MYH3, MYL1, MYBPC3, MYH4, MYH7, TPM1	114	39	18224	36.8907	1.55958e-08	7.79792e-09	1.09256e-07
GOTERM_CC_DIRECT	GO:0005829~cytosol	51	0.272203	1.36588e-10	RPL17, MYBPC2, TNNC2, TNNC1, MYBPC3, TTN, GSTM1, GSTM4, CTGF, HTRA1, ACTA1, ACTA2, MYH3, G3BP1, PRKAB2, ACTN2, FBP2, PFKM, ACTN3, TNNT3, CKM, TNNT1, RPS16, PGM1, RPL3L, CA3, CTSH, UGP2, ALDOA, MYL2, MYL3, MYL1, RPS15A, TPM1, RPS25, TPI1, SORBS1, ENO3, NEFL, GAPDH, EHD3, AK1, RPS9, MYLPF, TNNI1, AMPD1, TNNI2, PYGM, NEB, GAMT, PGK1	114	3315	18224	2.45938	2.39028e-08	7.96761e-09	1.6745e-07
GOTERM_BP_DIRECT	GO:0003009~skeletal muscle contraction	8	0.0426985	1.53107e-10	TNNT3, TNNT1, TNNC2, TNNC1, MYH3, MYH7, TNNI1, TNNI2	113	24	16792	49.5339	1.02122e-07	2.04245e-08	2.29402e-07
GOTERM_CC_DIRECT	GO:0032982~myosin filament	7	0.0373612	3.78415e-10	MYH1, MYBPC2, MYH3, MYBPH, MYH4, MYH7, MYH7B	114	16	18224	69.9386	6.62227e-08	1.65557e-08	4.63919e-07
GOTERM_CC_DIRECT	GO:0005861~troponin complex	6	0.0320239	4.62589e-10	TNNT3, TNNT1, TNNC2, TNNC1, TNNI1, TNNI2	114	8	18224	119.895	8.0953e-08	1.61906e-08	5.67111e-07
GOTERM_MF_DIRECT	GO:0005509~calcium ion binding	23	0.122758	8.91467e-10	BGLAP, TNNC2, MYL2, LDLR, MYL3, TNNC1, MYL1, FBN1, MYLPF, ACTN2, ACTN3, TTN, PVALB, CLEC3B, RYR3, FBLN5, ATP2A1, RYR1, TPT1, FBN3, CASQ1, SGCA, EHD3	110	717	16881	4.92282	1.65813e-07	5.5271e-08	1.10407e-06
GOTERM_CC_DIRECT	GO:0031674~I band	7	0.0373612	4.60475e-09	ALDOA, MYL3, CFL2, ATP2A1, RYR1, TTN, CASQ1	114	23	18224	48.6529	8.05832e-07	1.34305e-07	5.64521e-06
GOTERM_BP_DIRECT	GO:0055010~ventricular cardiac muscle tissue morphogenesis	7	0.0373612	1.22857e-08	MYL2, MYL3, TNNC1, MYBPC3, MYH7, TPM1, TNNI1	113	25	16792	41.6085	8.19454e-06	1.36576e-06	1.84078e-05
GOTERM_BP_DIRECT	GO:0006937~regulation of muscle contraction	6	0.0320239	2.30243e-08	TNNT3, TNNT1, TNNC2, TNNC1, TPM1, TNNI2	113	14	16792	63.6865	1.53571e-05	2.19388e-06	3.44976e-05
GOTERM_CC_DIRECT	GO:0031012~extracellular matrix	14	0.0747225	3.78531e-08	LAMA2, RPS25, TNXB, RPS16, HTRA1, CLEC3B, FBLN5, FBN1, COL1A2, RPS15A, FBN3, COL1A1, GAPDH, DPT	114	296	18224	7.56093	6.62427e-06	9.46327e-07	4.64061e-05
GOTERM_CC_DIRECT	GO:0070062~extracellular exosome	42	0.224167	4.21724e-08	ALDOA, TPPP3, RPS15A, TTN, RPS25, TPI1, C1QTNF3, PVALB, HTRA1, TPT1, IGLL1, ENO3, GAPDH, DPT, ICAM1, TNXB, ACTA1, ACTA2, MYH3, AK1, FBN1, RPS9, ACTN2, FBP2, PFKM, ACTN3, FXR2, ADIPOQ, LAMA2, RPS16, PYGM, NEB, CLEC3B, CFL2, FBLN5, PGM1, COL1A2, RYR1, GAMT, PGK1, CTSH, UGP2	114	2811	18224	2.38851	7.38014e-06	9.22521e-07	5.17013e-05
GOTERM_CC_DIRECT	GO:0030018~Z disc	10	0.0533732	4.99296e-08	NEB, CFL2, RYR3, RYR1, ACTN2, MYOZ1, MYH7, ACTN3, FBP2, TTN	114	118	18224	13.5474	8.73764e-06	9.70853e-07	6.12113e-05
GOTERM_BP_DIRECT	GO:0014883~transition between fast and slow fiber	5	0.0266866	6.46327e-08	TNNT1, TNNC1, MYH7, ACTN3, TNNI1	113	7	16792	106.144	4.31091e-05	5.38874e-06	9.68399e-05
GOTERM_BP_DIRECT	GO:0006096~glycolytic process	7	0.0373612	8.88567e-08	ALDOA, TPI1, PGM1, ENO3, PFKM, PGK1, GAPDH	113	34	16792	30.5945	5.92657e-05	6.58525e-06	0.000133135
GOTERM_BP_DIRECT	GO:0006094~gluconeogenesis	7	0.0373612	4.41797e-07	ALDOA, TPI1, PGM1, ENO3, FBP2, PGK1, GAPDH	113	44	16792	23.6412	0.000294636	2.94675e-05	0.000661948
GOTERM_CC_DIRECT	GO:0005865~striated muscle thin filament	5	0.0266866	4.47215e-07	NEB, ACTA1, TMOD4, TTN, LMOD3	114	11	18224	72.6635	7.82596e-05	7.82624e-06	0.000548263
GOTERM_BP_DIRECT	GO:0061621~canonical glycolysis	6	0.0320239	7.09745e-07	ALDOA, TPI1, ENO3, PFKM, PGK1, GAPDH	113	26	16792	34.2927	0.000473288	4.30354e-05	0.00106341
GOTERM_BP_DIRECT	GO:0045214~sarcomere organization	6	0.0320239	1.26106e-06	CFL2, MYH3, ACTN2, TTN, CASQ1, TPM1	113	29	16792	30.7452	0.000840776	7.00917e-05	0.00188945
GOTERM_CC_DIRECT	GO:0033017~sarcoplasmic reticulum membrane	6	0.0320239	2.02124e-06	TRDN, RYR3, ATP2A1, RYR1, CASQ1, DHRS7C	114	34	18224	28.2105	0.000353654	3.21556e-05	0.00247791
GOTERM_CC_DIRECT	GO:0015629~actin cytoskeleton	10	0.0533732	8.65262e-06	ALDOA, SMTN, NEB, MYL2, ACTA1, ACTA2, TNNC1, CFL2, PGM1, MYOZ1	114	218	18224	7.33301	0.00151307	0.000126177	0.0106072
GOTERM_CC_DIRECT	GO:0031430~M band	5	0.0266866	1.13302e-05	ALDOA, SMPX, MYOM1, TTN, LMOD3	114	23	18224	34.7521	0.00198083	0.000152511	0.0138894
GOTERM_BP_DIRECT	GO:0007155~cell adhesion	14	0.0747225	1.16455e-05	LAMA2, ICAM1, BGLAP, TNXB, SORBS1, MYBPC2, CTGF, MYBPH, MYBPC3, NINJ2, ACTN2, COL1A1, CD164, DPT	113	459	16792	4.53252	0.0077375	0.000597328	0.0174472
GOTERM_CC_DIRECT	GO:0016459~myosin complex	6	0.0320239	1.42222e-05	MYH1, MYL2, MYL3, MYH3, MYH7, MYH7B	114	50	18224	19.1832	0.00248581	0.000177763	0.0174343
GOTERM_MF_DIRECT	GO:0051015~actin filament binding	8	0.0426985	2.34115e-05	TNNC2, TNNC1, CFL2, MYH3, TMOD4, ACTN2, TTN, TPM1	110	132	16881	9.30083	0.00434513	0.00108806	0.0289911
GOTERM_CC_DIRECT	GO:0005615~extracellular space	23	0.122758	2.36031e-05	ALDOA, ICAM1, BGLAP, TNXB, ACTA1, GLDN, ACTA2, FBN1, CTSS, ADIPOQ, TPI1, C1QTNF3, HTRA1, CLEC3B, CTGF, CFL2, FBLN5, COL1A2, TPT1, ENO3, COL1A1, CTSH, DPT	114	1347	18224	2.7296	0.00412208	0.000275335	0.0289325
GOTERM_MF_DIRECT	GO:0042802~identical protein binding	17	0.0907344	2.42235e-05	ALDOA, LDLR, CLDN4, MYBPC3, PRKAB2, ACTN2, PFKM, FBP2, TTN, FXR2, ADIPOQ, COL1A2, COL1A1, MYOM1, NEFL, GAPDH, UGP2	110	749	16881	3.48315	0.0044955	0.00090072	0.0299965
