# Supplementary material for: Eya2 promotes cell cycle progression by regulating DNA damage response during vertebrate limb regeneration
Source: eLife. 2020 Mar 6;9:e51217. doi: 10.7554/eLife.51217 (PMC7093111; doi:10.7554/eLife.51217)
Supplement: Supplementary file 4. — This file contains the statistical analysis (statistical tests and all values related to the statistical test including number of samples tested (n)) used for each Figure and panel. Tabs are labeled based on the Figure and Figure Panel they are referring to. [file elife-51217-supp4.xlsx]

## Sheet: 1c
Related to Figure 1c
Table Analyzed	Comet Assay Regeneration - Scores - 5 Bins
Two-way ANOVA	Ordinary
Alpha	0.05
Source of Variation	% of total variation	P value	P value summary	Significant?
Interaction	17.1	<0.0001	****	Yes
Row Factor	73.36	<0.0001	****	Yes
Column Factor	0	>0.9999	ns	No
ANOVA table	SS	DF	MS	F (DFn, DFd)	P value
Interaction	1496	8	187	F (8, 30) = 6.727	P<0.0001
Row Factor	6416	4	1604	F (4, 30) = 57.71	P<0.0001
Column Factor	0	2	0	F (2, 30) = 0	P>0.9999
Residual	833.7	30	27.79
Number of missing values	0
Within each row, compare columns (simple effects within rows)
Number of families	5
Number of comparisons per family	3
Alpha	0.05
Bonferroni's multiple comparisons test	Mean Diff.	95.00% CI of diff.	Significant?	Summary	Adjusted P Value
0
Intact vs. Blastema	-6.265	-17.18 to 4.649	No	ns	0.4677
Intact vs. Blastema UV	17.2	6.287 to 28.12	Yes	**	0.0012
Blastema vs. Blastema UV	23.47	12.55 to 34.38	Yes	****	<0.0001
1
Intact vs. Blastema	-0.9933	-11.91 to 9.921	No	ns	>0.9999
Intact vs. Blastema UV	3.641	-7.274 to 14.56	No	ns	>0.9999
Blastema vs. Blastema UV	4.635	-6.28 to 15.55	No	ns	0.8706
2
Intact vs. Blastema	-0.4769	-11.39 to 10.44	No	ns	>0.9999
Intact vs. Blastema UV	-5.2	-16.12 to 5.714	No	ns	0.7092
Blastema vs. Blastema UV	-4.724	-15.64 to 6.191	No	ns	0.8436
3
Intact vs. Blastema	3.579	-7.336 to 14.49	No	ns	>0.9999
Intact vs. Blastema UV	-12.93	-23.85 to -2.018	Yes	*	0.016
Blastema vs. Blastema UV	-16.51	-27.43 to -5.597	Yes	**	0.0018
4
Intact vs. Blastema	4.157	-6.758 to 15.07	No	ns	>0.9999
Intact vs. Blastema UV	-2.71	-13.62 to 8.205	No	ns	>0.9999
Blastema vs. Blastema UV	-6.867	-17.78 to 4.048	No	ns	0.3634
Test details	Mean 1	Mean 2	Mean Diff.	SE of diff.	N1	N2	t	DF
0
Intact vs. Blastema	46.88	53.15	-6.265	4.304	3	3	1.456	30
Intact vs. Blastema UV	46.88	29.68	17.2	4.304	3	3	3.996	30
Blastema vs. Blastema UV	53.15	29.68	23.47	4.304	3	3	5.452	30
1
Intact vs. Blastema	11.78	12.77	-0.9933	4.304	3	3	0.2308	30
Intact vs. Blastema UV	11.78	8.137	3.641	4.304	3	3	0.8459	30
Blastema vs. Blastema UV	12.77	8.137	4.635	4.304	3	3	1.077	30
2
Intact vs. Blastema	9.801	10.28	-0.4769	4.304	3	3	0.1108	30
Intact vs. Blastema UV	9.801	15	-5.2	4.304	3	3	1.208	30
Blastema vs. Blastema UV	10.28	15	-4.724	4.304	3	3	1.097	30
3
Intact vs. Blastema	15.37	11.79	3.579	4.304	3	3	0.8315	30
Intact vs. Blastema UV	15.37	28.3	-12.93	4.304	3	3	3.005	30
Blastema vs. Blastema UV	11.79	28.3	-16.51	4.304	3	3	3.836	30
4
Intact vs. Blastema	16.17	12.01	4.157	4.304	3	3	0.9657	30
Intact vs. Blastema UV	16.17	18.88	-2.71	4.304	3	3	0.6296	30
Blastema vs. Blastema UV	12.01	18.88	-6.867	4.304	3	3	1.595	30

## Sheet: 1e
Related to Figure 1e
Table Analyzed	OLD H2AX/EF1A Expression Over-time - qPCR
Data sets analyzed	A-E
ANOVA summary
F	8.953
P value	0.0034
P value summary	**
Significant diff. among means (P < 0.05)?	Yes
R squared	0.7992
Brown-Forsythe test
F (DFn, DFd)	1.173 (4, 9)
P value	0.3846
P value summary	ns
Are SDs significantly different (P < 0.05)?	No
Bartlett's test
Bartlett's statistic (corrected)
P value
P value summary
Are SDs significantly different (P < 0.05)?
ANOVA table	SS	DF	MS	F (DFn, DFd)	P value
Treatment (between columns)	15.94	4	3.985	F (4, 9) = 8.953	P=0.0034
Residual (within columns)	4.006	9	0.4452
Total	19.95	13
Data summary
Number of treatments (columns)	5
Number of values (total)	14
Number of families	1
Number of comparisons per family	4
Alpha	0.05
Bonferroni's multiple comparisons test	Mean Diff.	95.00% CI of diff.	Significant?	Summary	Adjusted P Value	A-?
0 dpa vs. 3 dpa	-0.316	-2.011 to 1.379	No	ns	>0.9999	B	3 dpa
0 dpa vs. 7 dpa	-1.669	-3.564 to 0.2254	No	ns	0.0913	C	7 dpa
0 dpa vs. 14 dpa	-2.916	-4.611 to -1.221	Yes	**	0.0018	D	14 dpa
0 dpa vs. 21 dpa	-1.139	-2.834 to 0.5554	No	ns	0.2641	E	21 dpa
Test details	Mean 1	Mean 2	Mean Diff.	SE of diff.	n1	n2	t	DF
0 dpa vs. 3 dpa	1.001	1.317	-0.316	0.5448	3	3	0.5801	9
0 dpa vs. 7 dpa	1.001	2.67	-1.669	0.6091	3	2	2.741	9
0 dpa vs. 14 dpa	1.001	3.917	-2.916	0.5448	3	3	5.353	9
0 dpa vs. 21 dpa	1.001	2.14	-1.139	0.5448	3	3	2.091	9

## Sheet: 1g
Related to Figure 1g
Table Analyzed	Total total H2AX Quantification Regeneration Time Course - WB
Column B	14dpa
vs.	vs.
Column A	Intact
Unpaired t test
P value	0.0002
P value summary	***
Significantly different (P < 0.05)?	Yes
One- or two-tailed P value?	Two-tailed
t, df	t=5.33 df=12
How big is the difference?
Mean ± SEM of column A	42.19 ± 2.478, n=7
Mean ± SEM of column B	57.27 ± 1.367, n=7
Difference between means	15.08 ± 2.83
95% confidence interval	8.918 to 21.25
R squared (eta squared)	0.7031
F test to compare variances
F, DFn, Dfd	3.287, 6, 6
P value	0.1733
P value summary	ns
Significantly different (P < 0.05)?	No

## Sheet: 1h
Related to Figure 1h
Table Analyzed	Total gH2AX Quantification Regeneration Timce Course - WB
Column B	14dpa
vs.	vs.
Column A	Intact
Unpaired t test
P value	0.0042
P value summary	**
Significantly different (P < 0.05)?	Yes
One- or two-tailed P value?	Two-tailed
t, df	t=3.523 df=12
How big is the difference?
Mean ± SEM of column A	36.86 ± 0.9954, n=7
Mean ± SEM of column B	41.58 ± 0.8949, n=7
Difference between means	4.716 ± 1.339
95% confidence interval	1.8 to 7.633
R squared (eta squared)	0.5085
F test to compare variances
F, DFn, Dfd	1.237, 6, 6
P value	0.8027
P value summary	ns
Significantly different (P < 0.05)?	No

## Sheet: 1i
Related to Figure 1i
Table Analyzed	gH2AX/H2AX Quantification Regeneration Time course - WB
Column B	14dpa
vs.	vs.
Column A	Intact
Unpaired t test
P value	0.0112
P value summary	*
Significantly different (P < 0.05)?	Yes
One- or two-tailed P value?	Two-tailed
t, df	t=2.993 df=12
How big is the difference?
Mean ± SEM of column A	1 ± 0.05039, n=7
Mean ± SEM of column B	0.8213 ± 0.03199, n=7
Difference between means	-0.1787 ± 0.05969
95% confidence interval	-0.3087 to -0.04861
R squared (eta squared)	0.4275
F test to compare variances
F, DFn, Dfd	2.48, 6, 6
P value	0.2934
P value summary	ns
Significantly different (P < 0.05)?	No

## Sheet: 1j
Related to Figure 1j
Table Analyzed	pS139/Y142-H2AX/H2AX Quantification Regeneration Time course - WB
Column B	14dpa
vs.	vs.
Column A	Intact
Unpaired t test
P value	0.0145
P value summary	*
Significantly different (P < 0.05)?	Yes
One- or two-tailed P value?	Two-tailed
t, df	t=2.855 df=12
How big is the difference?
Mean ± SEM of column A	1 ± 0.08571, n=7
Mean ± SEM of column B	1.266 ± 0.03668, n=7
Difference between means	0.2661 ± 0.09323
95% confidence interval	0.063 to 0.4692
R squared (eta squared)	0.4044
F test to compare variances
F, DFn, Dfd	5.461, 6, 6
P value	0.058
P value summary	ns
Significantly different (P < 0.05)?	No

## Sheet: 1k
Related to Figure 1k
Table Analyzed	Y142-H2AX derived Quantification Regeneration Time course - WB
Column B	14dpa
vs.	vs.
Column A	Intact
Unpaired t test
P value	0.0032
P value summary	**
Significantly different (P < 0.05)?	Yes
One- or two-tailed P value?	Two-tailed
t, df	t=3.67 df=12
How big is the difference?
Mean ± SEM of column A	1 ± 0.1129, n=7
Mean ± SEM of column B	1.511 ± 0.08153, n=7
Difference between means	0.5111 ± 0.1392
95% confidence interval	0.2077 to 0.8145
R squared (eta squared)	0.5289
F test to compare variances
F, DFn, Dfd	1.917, 6, 6
P value	0.4482
P value summary	ns
Significantly different (P < 0.05)?	No

## Sheet: 2b
Related to Figure 2b
Table Analyzed	OLD - Eya2/EF1A Expression Over-time - qPCR
Data sets analyzed	A : 0 dpa	B : 3 dpa	C : 7 dpa	D : 14 dpa	E : 21 dpa
ANOVA summary
F	29.61
P value	<0.0001
P value summary	****
Significant diff. among means (P < 0.05)?	Yes
R square	0.9294
Brown-Forsythe test
F (DFn, DFd)	0.3247 (4, 9)
P value	0.8546
P value summary	ns
Are SDs significantly different (P < 0.05)?	No
Bartlett's test
Bartlett's statistic (corrected)
P value
P value summary
Are SDs significantly different (P < 0.05)?
ANOVA table	SS	DF	MS	F (DFn, DFd)	P value
Treatment (between columns)	7.527	4	1.882	F (4, 9) = 29.61	P<0.0001
Residual (within columns)	0.572	9	0.06355
Total	8.099	13
Data summary
Number of treatments (columns)	5
Number of values (total)	14
Number of families	1
Number of comparisons per family	10
Alpha	0.05
Bonferroni's multiple comparisons test	Mean Diff.	95.00% CI of diff.	Significant?	Summary	Adjusted P Value
0 dpa vs. 3 dpa	-0.4773	-1.237 to 0.2821	No	ns	0.4556	A-B
0 dpa vs. 7 dpa	-1.625	-2.474 to -0.7761	Yes	***	0.0006	A-C
0 dpa vs. 14 dpa	-1.935	-2.694 to -1.176	Yes	****	<0.0001	A-D
0 dpa vs. 21 dpa	-1.326	-2.086 to -0.5666	Yes	**	0.0012	A-E
3 dpa vs. 7 dpa	-1.148	-1.997 to -0.2988	Yes	**	0.0075	B-C
3 dpa vs. 14 dpa	-1.458	-2.217 to -0.6982	Yes	***	0.0006	B-D
3 dpa vs. 21 dpa	-0.8487	-1.608 to -0.08929	Yes	*	0.0258	B-E
7 dpa vs. 14 dpa	-0.3098	-1.159 to 0.5393	No	ns	>0.9999	C-D
7 dpa vs. 21 dpa	0.2991	-0.55 to 1.148	No	ns	>0.9999	C-E
14 dpa vs. 21 dpa	0.6089	-0.1506 to 1.368	No	ns	0.1601	D-E
Test details	Mean 1	Mean 2	Mean Diff.	SE of diff.	n1	n2	t	DF
0 dpa vs. 3 dpa	1	1.477	-0.4773	0.2058	3	3	2.319	9
0 dpa vs. 7 dpa	1	2.625	-1.625	0.2301	3	2	7.062	9
0 dpa vs. 14 dpa	1	2.935	-1.935	0.2058	3	3	9.401	9
0 dpa vs. 21 dpa	1	2.326	-1.326	0.2058	3	3	6.442	9
3 dpa vs. 7 dpa	1.477	2.625	-1.148	0.2301	3	2	4.988	9
3 dpa vs. 14 dpa	1.477	2.935	-1.458	0.2058	3	3	7.082	9
3 dpa vs. 21 dpa	1.477	2.326	-0.8487	0.2058	3	3	4.123	9
7 dpa vs. 14 dpa	2.625	2.935	-0.3098	0.2301	2	3	1.346	9
7 dpa vs. 21 dpa	2.625	2.326	0.2991	0.2301	2	3	1.3	9
14 dpa vs. 21 dpa	2.935	2.326	0.6089	0.2058	3	3	2.958	9

## Sheet: 3c
Related to Figure 3c
Table Analyzed	Blastema Length Over-time normalized to Animal Size- BrightField
Two-way RM ANOVA	Matching: Stacked
Alpha	0.05
Source of Variation	% of total variation	P value	P value summary	Significant?
Interaction	0.4666	0.0144	*	Yes
Time	87.56	<0.0001	****	Yes
Column Factor	3.323	0.0033	**	Yes
Subjects (matching)	6.881	<0.0001	****	Yes
ANOVA table	SS	DF	MS	F (DFn, DFd)	P value
Interaction	0.006584	4	0.001646	F (4, 58) = 3.402	P=0.0144
Time	1.236	2	0.6178	F (2, 58) = 1277	P<0.0001
Column Factor	0.04689	2	0.02345	F (2, 29) = 7.002	P=0.0033
Subjects (matching)	0.0971	29	0.003348	F (29, 58) = 6.922	P<0.0001
Residual	0.02806	58	0.0004838
Number of missing values	0
Within each row, compare columns (simple effects within rows)
Number of families	1
Number of comparisons per family	9
Alpha	0.05
Bonferroni's multiple comparisons test	Mean Diff.	95.00% CI of diff.	Significant?	Summary	Adjusted P Value
Row 1
Eya2+/+ vs. Eya2+/-	-0.006399	-0.05464 to 0.04184	No	ns	>0.9999
Eya2+/+ vs. Eya2-/-	0.02949	-0.01669 to 0.07568	No	ns	0.6551
Eya2+/- vs. Eya2-/-	0.03589	-0.01029 to 0.08208	No	ns	0.2675
Row 2
Eya2+/+ vs. Eya2+/-	-0.004838	-0.05308 to 0.0434	No	ns	>0.9999
Eya2+/+ vs. Eya2-/-	0.032	-0.01418 to 0.07819	No	ns	0.4674
Eya2+/- vs. Eya2-/-	0.03684	-0.009341 to 0.08303	No	ns	0.2319
Row 3
Eya2+/+ vs. Eya2+/-	-0.02272	-0.07096 to 0.02552	No	ns	>0.9999
Eya2+/+ vs. Eya2-/-	0.05564	0.009458 to 0.1018	Yes	**	0.0084
Eya2+/- vs. Eya2-/-	0.07836	0.03218 to 0.1245	Yes	****	<0.0001
Test details	Mean 1	Mean 2	Mean Diff.	SE of diff.	N1	N2	t	DF
Row 1
Eya2+/+ vs. Eya2+/-	0.09975	0.1061	-0.006399	0.01696	10	10	0.3772	87
Eya2+/+ vs. Eya2-/-	0.09975	0.07025	0.02949	0.01624	10	12	1.816	87
Eya2+/- vs. Eya2-/-	0.1061	0.07025	0.03589	0.01624	10	12	2.21	87
Row 2
Eya2+/+ vs. Eya2+/-	0.255	0.2599	-0.004838	0.01696	10	10	0.2852	87
Eya2+/+ vs. Eya2-/-	0.255	0.223	0.032	0.01624	10	12	1.971	87
Eya2+/- vs. Eya2-/-	0.2599	0.223	0.03684	0.01624	10	12	2.269	87
Row 3
Eya2+/+ vs. Eya2+/-	0.3814	0.4041	-0.02272	0.01696	10	10	1.339	87
Eya2+/+ vs. Eya2-/-	0.3814	0.3258	0.05564	0.01624	10	12	3.426	87
Eya2+/- vs. Eya2-/-	0.4041	0.3258	0.07836	0.01624	10	12	4.825	87

## Sheet: 3e
Related to Figure 3e
Table Analyzed	Zeugopod Length 30dpa - normalized to Animal Size - SklPr
Data sets analyzed	A : Eya2+/+	B : Eya2+/-	C : Eya2-/-
ANOVA summary
F	5.727
P value	0.009
P value summary	**
Significant diff. among means (P < 0.05)?	Yes
R square	0.3142
Brown-Forsythe test
F (DFn, DFd)	0.6077 (2, 25)
P value	0.5524
P value summary	ns
Are SDs significantly different (P < 0.05)?	No
Bartlett's test
Bartlett's statistic (corrected)	1.715
P value	0.4242
P value summary	ns
Are SDs significantly different (P < 0.05)?	No
ANOVA table	SS	DF	MS	F (DFn, DFd)	P value
Treatment (between columns)	0.05872	2	0.02936	F (2, 25) = 5.727	P=0.0090
Residual (within columns)	0.1282	25	0.005127
Total	0.1869	27
Data summary
Number of treatments (columns)	3
Number of values (total)	28
Number of families	1
Number of comparisons per family	3
Alpha	0.05
Bonferroni's multiple comparisons test	Mean Diff.	95.00% CI of diff.	Significant?	Summary	Adjusted P Value
Eya2+/+ vs. Eya2+/-	0.008784	-0.07563 to 0.0932	No	ns	>0.9999	A-B
Eya2+/+ vs. Eya2-/-	0.1024	0.01577 to 0.189	Yes	*	0.0167	A-C
Eya2+/- vs. Eya2-/-	0.09359	0.009174 to 0.178	Yes	*	0.0262	B-C
Test details	Mean 1	Mean 2	Mean Diff.	SE of diff.	n1	n2	t	DF
Eya2+/+ vs. Eya2+/-	0.3701	0.3614	0.008784	0.0329	9	10	0.267	25
Eya2+/+ vs. Eya2-/-	0.3701	0.2678	0.1024	0.03375	9	9	3.033	25
Eya2+/- vs. Eya2-/-	0.3614	0.2678	0.09359	0.0329	10	9	2.845	25

[truncated: 30 more sheets: 3f, 3i, 3j, 3k, 4b, 4c, 4d, 4f, 4h, 4i, 6c, 6e, 6f, 6h, 6i, 6l, 6n, 6o, F1-FS2, F3-FS2b …]
